1 **Title:**

2 An integrated transcriptomic and comparative genomic analysis of differential gene expression  
3 in Arctic charr (*Salvelinus alpinus*) following seawater exposure  
4

5 **Authors:**

6 Joseph D. Norman<sup>1\*</sup>, Moira M. Ferguson<sup>1</sup>, Roy G. Danzmann<sup>1</sup>  
7

8 **Affiliation:**

9 <sup>1</sup>Department of Integrative Biology, University of Guelph, Guelph, Ontario, Canada, N1G 2W1  
10

11 **\*Corresponding author:**

12 Joseph D. Norman  
13 Integrative Biology  
14 Science Complex  
15 University of Guelph  
16 50 Stone Road East  
17 Guelph, Ontario, Canada, N1G 2W1  
18

19 Email: jnorman@uoguelph.ca  
20 Telephone: 001 519 824-4120 ext. 58596  
21 Fax: 001 519 767-1656  
22

23 **Running head:**

24 Hypo-osmoregulation in Arctic charr  
25

26 **SUMMARY**

27 High-throughput RNA sequencing was employed to compare expression profiles in two  
28 Arctic charr (*Salvelinus alpinus*) families post seawater exposure to identify genes and biological  
29 processes involved in hypo-osmoregulation and regulation of salinity tolerance. To further  
30 understand the genetic architecture of hypo-osmoregulation, the genomic organization of  
31 differentially expressed (DE) genes was also analysed. Using a *de novo* gill transcriptome  
32 assembly we found over 2300 contigs to be DE. Major transporters from the seawater  
33 mitochondrion-rich cell (MRC) complex were up-regulated in seawater. Expression ratios for  
34 257 differentially expressed contigs were highly correlated between families, suggesting they are  
35 strictly regulated. Based on expression profiles and known molecular pathways we inferred that  
36 seawater exposure induced changes in methylation states and elevated peroxynitrite formation in  
37 gill. We hypothesized that concomitance between DE immune genes and the transition to a  
38 hypo-osmoregulatory state could be related to Cl<sup>-</sup> sequestration by antimicrobial defence  
39 mechanisms. Gene Ontology analysis revealed that cell division genes were up-regulated, which

40 could reflect the proliferation of ATP1 $\alpha$ 1b-type seawater MRCs. Comparative genomics  
41 analyses suggest that hypo-osmoregulation is influenced by the relative proximities among a  
42 contingent of genes on Arctic charr linkage groups AC-4 and AC-12 that exhibit homologous  
43 affinities with a region on stickleback chromosome Ga-I. This supports the hypothesis that  
44 relative gene location along a chromosome is a property of the genetic architecture of hypo-  
45 osmoregulation. Evidence of non-random structure between hypo-osmoregulation candidate  
46 genes was found on AC-1/11 and AC-28, suggesting that interchromosomal rearrangements  
47 played a role in the evolution of hypo-osmoregulation in Arctic charr.

48

49 **Keywords:**

50 RNA-Seq, gene expression, osmoregulation, salinity tolerance, Salmonidae, *Salvelinus alpinus*

51

52 **INTRODUCTION**

53 Migration between freshwater and seawater habitats is an important stage in the ontogeny  
54 of anadromous salmonids (Hoar, 1988). Freshwater and seawater impose adverse and  
55 contrasting types of osmoregulatory stress, such that maintenance of internal ion homeostasis is  
56 paramount for survival. The transition from freshwater to seawater requires osmoregulatory  
57 mechanisms to switch from a state of ion absorption (i.e., hyper-osmoregulation) to one of ion  
58 excretion (i.e., hypo-osmoregulation). Gill tissue epithelial cells play an integral role in this  
59 process (Evans et al., 2005; Marshall and Grosell, 2006).

60

61 Mitochondrion-rich cells (MRCs) form a complex with accessory cells and pavement  
62 cells in the epithelial layer of gill tissue (Evans et al., 2005; Marshall and Grosell, 2006). In  
63 seawater this complex facilitates excretion of excess Cl<sup>-</sup> and Na<sup>+</sup> from blood to seawater. Cl<sup>-</sup>  
64 excretion is achieved via the collective function of three interdependent membrane-bound ion  
65 transporters found in MRCs: Na<sup>+</sup>/K<sup>+</sup>/2Cl<sup>-</sup>, Na<sup>+</sup>/K<sup>+</sup>-ATPase, cystic fibrosis transmembrane  
66 conductance regulator. Na<sup>+</sup> excretion occurs through leaky paracellular pores located between  
67 MRCs and accessory cells (Silva et al., 1977; Marshall and Grosell, 2006), where permeability  
68 seems to be dependent upon the claudin isoform located at the tight junction (Furuse et al., 2001;  
69 Van Itallie et al., 2006; Tipsmark et al., 2008). Elevated expression of these transporters occurs  
70 concomitantly with an increase in the size and quantity of MRCs, which is controlled by cortisol

71 and growth hormone (McCormick, 2001; Marshall and Grosell, 2006). Despite the prominent  
72 role that MRCs have in hypo-osmoregulation, they comprise less than 10% of gill tissue  
73 epithelium, while pavement cells cover over 90% (Wilson and Laurent, 2002; Evans et al.,  
74 2005).

75  
76 Variable functions for the genes regulating ion transport in teleost gill tissues can be  
77 achieved as a result of the whole genome duplications that teleost fishes underwent in their  
78 evolutionary origins (Spring, 1997; Jaillon et al., 2004). Furthermore, as a result of tandem  
79 duplications and an additional whole-genome duplication in salmonids (Allendorf and  
80 Thorgaard, 1984), these species possess a repertoire of functionally distinct isoforms of genes  
81 that are components of the seawater MRC complex.  $\text{Na}^+/\text{K}^+$ -ATPase isoforms *ATP1 $\alpha$ a* and  
82 *ATP1 $\alpha$ b* exhibit reciprocal expression in freshwater and seawater. In seawater, *ATP1 $\alpha$ b* is up-  
83 regulated and *ATP1 $\alpha$ a* is down-regulated, while the opposite occurs in freshwater (Richards et  
84 al., 2003; Mackie et al., 2005; Bystriansky et al., 2006; Nilsen et al., 2007; Larsen et al., 2008;  
85 Madsen et al., 2009; McCormick et al., 2009). *ATP1 $\alpha$ a* and *ATP1 $\alpha$ b* are also expressed in  
86 separate MRCs (McCormick et al., 2009). There are two *NKCC1* isoforms (i.e., *NKCC1a* and  
87 *NKCC1b*), but evidence suggests that only *NKCC1a* is significantly expressed in the gill of  
88 fishes in seawater (Cutler and Cramb, 2002; Tipsmark et al., 2002; Scott et al., 2004; Lorin-  
89 Nebel et al., 2006; Tse et al., 2006; Hiroi et al., 2008; Kang et al., 2010). In Atlantic salmon  
90 (*Salmo salar*), two *CFTR* isoforms are expressed in gill (i.e., *CFTRI* and *CFTRII*) (Chen et al.,  
91 2001; Mackie et al., 2005). Although both are up-regulated in seawater, temporal expression  
92 patterns are variable (Singer et al., 2002; Mackie et al., 2007; Aykanat et al., 2011). Five claudin  
93 isoforms have been detected in Atlantic salmon gill tissue; *cCLDN10E*, *CLDN27A*, *CLDN28A*,  
94 *CLDN28B*, and *CLDN30*. In seawater, *CLDN10E* mRNA is significantly up-regulated while  
95 *CLDN27A* and *CLDN30* mRNA is down-regulated (Tipsmark et al., 2008; Engelund et al.,  
96 2012). Overall, the pattern emerging seems to be an evolutionary divergence of hypo-  
97 osmoregulatory function towards distinct freshwater and seawater isoforms.

98  
99 Large-scale transcriptomics analyses in a variety of teleosts have broadened our  
100 understanding of hypo-osmoregulation in fishes. Studies that assess differential gene expression  
101 in gill between fish in freshwater and seawater (Boutet et al., 2006; Kalujnaia et al., 2007; Evans

102 and Somero, 2008; Tine et al., 2008; Evans et al., 2011) demonstrate that hypo-osmoregulation is  
103 influenced by diverse biological processes that extend well beyond the mechanisms described by  
104 the seawater MRC complex. As the number of studies has increased, patterns have emerged  
105 suggesting hypo-osmoregulation in different taxa is influenced by some of the same biological  
106 processes. These include cell-cycle regulation, cell metabolism, protein synthesis and regulation,  
107 cytoskeleton and structural proteins, and immune system response (Boutet et al., 2006; Kalujnaia  
108 et al., 2008; Evans and Somero, 2008; Tine et al., 2008). Notable in their absence are controlled  
109 laboratory experiments on salmonids, species for which salinity tolerance has important  
110 implications from both life-history and economic perspectives. Salmonids have been studied in  
111 their natural state during different life-history stages in their anadromous life-cycle, although  
112 such studies are far from complete. For example Evans et al. (2011) examined the hyper-  
113 osmoregulatory aspects of gill function by sampling sockeye salmon (*Oncorhynchus nerka*) on  
114 their return to freshwater natal spawning grounds. Because their work was based on fish  
115 migrating from seawater to freshwater (instead of freshwater to seawater), it may only reflect  
116 part of the story about differential expression (DE) in genes involved in seawater acclimation.

117  
118 Large-scale gene expression analysis can also be used to gain insight about the genetic  
119 basis of salinity tolerance. Salmonids exhibit diverse salinity tolerance capacities, both within  
120 and among species (Hoar, 1988; Delabbio et al., 1990; Schmitz et al., 1995; Singer et al., 2002;  
121 Mackie et al., 2005; Shrimpton et al., 2005; Bystriansky et al., 2006; Hiroi and McCormick,  
122 2007; Nilsen et al., 2007). Within species, quantitative trait locus (i.e., QTL) studies indicate  
123 that variation has a genetic basis (Le Bras et al., 2011; Norman et al., 2011; Norman et al., 2012).  
124 Genes differentially regulated in Arctic charr (*Salvelinus alpinus*) with contrasting salinity  
125 tolerance capacities have been identified using large-scale gene expression analysis on gill tissue.  
126 Evidence suggests the genes that affect variation in salinity tolerance capacity might be different  
127 from the genes that are required for ionoregulation in hyper-osmotic conditions (Norman et al.,  
128 2014). Transcriptome-wide experiments assessing DE in Arctic charr between freshwater and  
129 seawater environments would permit further investigation of these differences. As the number of  
130 large-scale expression studies on salinity tolerance increases, comparisons between species may  
131 provide insight about the nature of the diverse salinity tolerance capacities that characterize

132 salmonids. Such work would also facilitate further research on the propensity of new candidate  
133 genes to confer genetically-based phenotypic variation.

134  
135 Differences in the genomic organization of salinity tolerance candidate genes may also  
136 influence inter- and intraspecific variation in salinity tolerance capacity. Clustered genes in  
137 vertebrates are more likely to be co-expressed (Hurst et al., 2004; Ng et al., 2009; Woo et al.,  
138 2010) and co-methylated (McGowan et al., 2011) and thus are more likely to be involved in the  
139 same or closely-related biological pathways. For instance, candidate genes in salmonids show  
140 evidence of clustering along linkage groups (Norman et al., 2012) and similar patterns are  
141 evident on model teleost chromosomes (e.g., medaka, stickleback, zebrafish) (Norman et al.,  
142 2012) and on reconstructed proto-actinopterygian ancestral chromosomes (Kasahara et al.,  
143 2007). Current data indicate that inter-chromosomal rearrangements in the Atlantic salmon  
144 genome have produced unique combinations of salinity tolerance candidate genes, which may be  
145 related to the high salinity tolerance capacity that is characteristic of this species (Norman et al.,  
146 2012). However, these observations are based on relatively few candidate genes. The myriad  
147 candidate genes that are typically produced by large-scale gene expression analysis would permit  
148 a more in-depth characterization of these patterns. The production of candidate gene lists  
149 produced by large-scale gene expression analysis coupled with *in silico* comparative genomics  
150 approaches will facilitate a more in-depth investigation of these patterns, providing additional  
151 insight about the genetic architecture of salinity tolerance in salmonids.

152  
153 In this study we collected large-scale gene expression data from Arctic charr to gain  
154 insight about the genes and biological processes that affect salinity tolerance in this species.  
155 Specifically, we used high-throughput mRNA sequencing technology to compare expression  
156 profiles between fish exposed to freshwater and seawater. We then investigated the genome  
157 organization of differentially expressed genes (DEGs) to gain insight about putative non-random  
158 patterns in the genetic architecture of salinity tolerance. Our specific objectives were to identify  
159 genes differentially expressed in Arctic charr gill tissue after transfer to seawater from  
160 freshwater, and to characterize which biological processes affect hypo-osmoregulation in this  
161 species. Based upon comparisons with other teleost species, inferences on the locations of the  
162 DEGs were made (i.e., putative retention of synteny blocks) and used to test if DEGs are

163 clustered, and whether or not genes or gene clusters are randomly distributed among Arctic charr  
164 linkage groups.

165

## 166 **RESULTS Differential expression analysis**

167 Analyses conducted using EBSeq (Leng et al., 2013) revealed that 1075 and 1544 contigs  
168 were DE between seawater and freshwater treatments for family 10 (F10) and family 12 (F12),  
169 respectively (Fig. 1). For F10, 568 (52.8%) contigs were up-regulated and 507 were down-  
170 regulated, while for F12, 812 (53.9%) contigs were up-regulated and 732 were down-regulated.  
171 A comparison between families revealed that 257 contigs were DE in both families (Table S1).  
172 Interestingly, a striking congruence in both the direction and magnitude of expression was  
173 observed for all 257 contigs (Fig. 2;  $F = 3118.10$ ; regression d.f. = 1; residual d.f. = 255;  $R^2 =$   
174  $0.924$ ;  $P < 0.000001$ ). The majority (84.4%) of these exhibited an inter-familial difference in  
175 expression ratio that was less than 0.5 (i.e., a 1.4-fold increase) (Fig. 3), and slightly more  
176 contigs were up-regulated (51.7%; Table 1) than down-regulated (Table 2).

177

## 178 **Contig annotation**

179 Alignments against the non-redundant protein database at NCBI were successful for  
180 60,565 of 108,645 assembled contigs (55.7%). To test if they were accurate, we aligned all  
181 unannotated contigs (i.e., 40,080) against EST databases for rainbow trout (*Oncorhynchus*  
182 *mykiss*) (release 8) and Atlantic salmon (release 6) from the Gene Index Project at the Dana-  
183 Farber Cancer Institute (Quakenbush et al., 2001), using criteria described in Materials and  
184 Methods. Significant alignments were observed for 36,879 contigs (76.7%). Thus, in total,  
185 97,444 of 108,645 assembled contigs (89.6%) were verified by significant alignments to external  
186 databases. The number of annotated DE contigs for F10 and F12 was 832 (Table S2) and 1177  
187 (Table S3), respectively.

188

## 189 **Gene Ontology analysis**

190 F10 and F12 shared 25 Gene Ontology (GO) categories significantly enriched for up-  
191 regulated genes (Table 3, Table S4-S9). Collectively, these categories represented biological  
192 processes related to cell division, cell proliferation, and responses to stress. In contrast, F10 and  
193 F12 shared only six categories enriched for down-regulated genes, which were related to

194 developmental processes, such as organ development. Tests for disproportionate representation  
195 of genes in biological process categories revealed that seven categories for up-regulated genes  
196 were different between families (Table 4). Together they represented two general processes,  
197 mRNA processing and splicing, and cellular metabolic processes involving nucleic acids. No  
198 differences were observed for down-regulated gene categories.

199

## 200 **Proximity of differentially expressed genes**

201 Comparisons of mean intergenic distance (IGD) between stickleback genes and genes DE  
202 in seawater gill tissue revealed that DEGs homologous with certain stickleback chromosomes  
203 were significantly closer to one another than the respective chromosomal-wide means (Fig. 4;  
204 Table S10). In F10 these patterns were found on Ga-II, -V, -XV, and -XVII, all of which  
205 exhibited  $P < 0.001$ . DEGs that aligned to Ga-II and -V were over 1 Mbp closer to one another  
206 on average, while those aligned to Ga-XV and -XVII were 660 kbp and 704 kbp closer to one  
207 another, respectively. For eight stickleback chromosomes the chromosomal-wide mean IGD was  
208 significantly lower than the mean IGD of the corresponding set of homologous DEGs from  
209 Arctic charr F10, which were 460 kbp to 1.13 Mbp further apart. In F12, DEGs that aligned to  
210 Ga-I, -IV, -V, and -X were significantly closer to one another than the corresponding  
211 chromosomal-wide means by at least 480 kbp. With the exception of Ga-X ( $P = 0.0281$ ), these  
212 differences were also highly significant ( $P \leq 0.0013$ ). Only four stickleback chromosomes (Ga-  
213 III, -VI, -VIII, and -XIV) had a mean IGD that was significantly lower than the corresponding  
214 set of homologous DEGs from F12. Consensus between families was evident for Ga-III, -V, and  
215 -VIII; however, only for Ga-V were the mean IGDs from DEGs significantly lower than the  
216 chromosomal-wide mean.

217

## 218 **Characterization of differentially expressed gene clusters**

219 Translated blast alignments (i.e., BLASTX) of DE contigs against the stickleback cDNA  
220 database yielded 507 hits for F10, of which 54.8% (i.e., 278 contigs) were up-regulated. For  
221 F12, 695 significant alignments were observed and of these 51.7% (i.e., 359 contigs) were up-  
222 regulated. In terms of DEGs located within 40 kbp of one another, 107 DEGs formed 50 clusters  
223 of two or more in F10 (Table S11), which contained five three-gene clusters and one four-gene  
224 cluster. In F12, 252 DEGs formed 105 clusters of two or more (Table S12). Most genes

225 occurred in clusters of two (72.3%); however, clusters of three (19.0%), four (5.7%), five (1.9%),  
226 and six (1.0%) were also evident. In F10, 36 clusters (50% were up-regulated) showed  
227 congruency in the direction of expression (i.e., genes in these clusters were either all up-  
228 regulated or all down-regulated), while in F12, 48 clusters were congruent (56% were up-  
229 regulated). Notably, the proportion of IGDs that were  $\leq 40$  kbp was highly similar between all  
230 protein-coding genes from the stickleback genome ( $63918/9180573 = 0.0069$ ) and the DEGs  
231 from F10 ( $53/8457 = 0.0063$ ) and F12 ( $126/18095 = 0.0069$ ), which suggests that the proportion  
232 of DEGs within 40 kbp of one another was the same as would be expected by chance.

233

### 234 **Enrichment of differentially expressed genes in synteny blocks**

235 Three synteny blocks (i.e., chromosomal segments where a contingent of genes is  
236 conserved between two species) contained a greater number of DEGs than expected by chance  
237 (Table 5). All were observed in F10, while only the AC-1/Ga-XVII synteny block passed the  
238 FDR corrected threshold. No synteny blocks deviated from expectations for F12.

239

## 240 **DISCUSSION**

241 This is the first study to use high-throughput RNA sequencing in a controlled laboratory  
242 experiment to compare gene expression profiles in the gills of a salmonid species reared in  
243 freshwater and seawater. Using a *de novo* transcriptome assembly we conducted a large-scale  
244 analysis to gain insight about the genes and biological processes important for hypo-  
245 osmoregulation in Arctic charr. To make inferences about the conservation of candidate genes  
246 and biological processes in different taxa, we studied two families and compared our findings  
247 with those from similar studies on other salmonids. We examined gene cluster patterns and the  
248 distribution of DEGs to test hypotheses about the genetic architecture of salinity tolerance. Our  
249 large-scale gene expression analysis has provided a broad perspective of hypo-osmoregulation in  
250 Arctic charr, which will be a foundation for future studies to pursue answers to new questions  
251 about the physiological and genetic processes that influence hypo-osmoregulation.

252

253 Multiple salinity tolerance candidate genes from the seawater MRC complex (Evans et  
254 al., 2005; Marshall and Grosell, 2006) were DE in the gill of Arctic charr after transfer to  
255 seawater. Among the up-regulated genes were  $\text{Na}^+/\text{K}^+$ -ATPase subunit alpha 1b (*ATP1a1b*),



256  $\text{Na}^+/\text{K}^+/\text{2Cl}^-$  co-transporter 1a (*NKCC1a*), cystic fibrosis transmembrane conductance regulator  
257 II (*CFTRII*) and *CLDN10E* (Table S3). These findings confirm previous research in other  
258 salmonid species (Singer et al., 2002; Tipsmark et al., 2002; Richards et al., 2003; Mackie et al.,  
259 2005; Bystriansky et al., 2006; Nilsen et al., 2007; Larsen et al., 2008; Tipsmark et al., 2008;  
260 Madsen et al., 2009; McCormick et al., 2009). Furthermore, *ATP1 $\alpha$ 1a* was down-regulated in  
261 seawater, as expected given that *ATP1 $\alpha$ 1a* and *ATP1 $\alpha$ 1b* are reciprocally expressed (Richards et  
262 al., 2003; Mackie et al., 2005; Bystriansky et al., 2006; Nilsen et al., 2007; Larsen et al., 2008;  
263 Madsen et al., 2009; McCormick et al., 2009) and regulated (McCormick et al., 2009) between  
264 freshwater and seawater environments. This consistency with the general literature on hypo-  
265 osmoregulation indicates that our experimental design and analysis produced reliable data.  
266

267 The two families exhibited different gene expression patterns for major transporters from  
268 the seawater MRC complex. *ATP1 $\alpha$ 1b*, *NKCC1a*, *CFTRII*, and *CLDN10E* were DE in F12 but  
269 not in F10, while *ATP1 $\alpha$ 1a* exhibited DE in both families. This difference is consistent with  
270 previous research showing that only F12 QTL colocalize with the locations of seawater MRC  
271 complex candidate genes (Norman et al., 2014). Genome scans for salinity tolerance QTL using  
272 the same fish revealed that only 17.6% (i.e., 3/17) were detected in both families. Moreover,  
273 QTL colocalize with *ATP1 $\alpha$ 1b* and *NKCC1* on Arctic charr linkage groups in F12 but not F10  
274 (Norman et al., 2012). Thus, differences in salinity tolerance between F10 and F12 are evident at  
275 both nucleotide and transcriptional levels.  
276

277 Our findings suggest that hypo-osmoregulation in Arctic charr may be regulated by a  
278 "core" gene subset that has limited capacity for plasticity in expression. In total, 257 DEGs from  
279 both families had expression ratios showing a remarkable consistency in magnitude and direction  
280 (Fig. 1). Predicting whether this pattern is conserved in other populations or in other salmonids  
281 is difficult, as current evidence is equivocal. For instance, the consistency in expression of this  
282 core subset might be related to the shared genetic background of the families, as both were  
283 derived from the same strain. Nevertheless, both families were generated by outbred crosses  
284 from unrelated parents and results from QTL experiments do support the concept of genetic  
285 heterogeneity between the families (Norman et al., 2011).  
286

287 Comparing expression profiles among genes from the core subset provides clues about  
288 the molecular pathways involved, permitting inferences about biological significance to be made.  
289 For instance, changes in the direction of transcription of genes involved in methylation suggest  
290 that methylation states were altered in seawater-exposed fish. Adenosylhomocysteinase was up-  
291 regulated, and as part of the methionine cycle (Fig. 5), this enzyme catalyzes a reversible  
292 reaction that is thermodynamically favoured towards the production of S-adenosylhomocysteine  
293 from homocysteine and adenosine. S-adenosylhomocysteine is a potent inhibitor of  
294 methyltransferases (Hoffman et al., 1980), leading to increased hypomethylation levels of  
295 proteins, lipids, polyamines, and chromatin, which in turn have been linked to altered gene  
296 expression and cellular differentiation states (reviewed in James et al., 2002). Adenosine  
297 removal by adenosine kinase (up-regulated in F10) may reduce the availability of adenosine to  
298 adenosylhomocysteinase, thereby promoting conditions favouring the formation of homocysteine  
299 and adenosine. Gene transcription profiles for other components of the methionine cycle provide  
300 further support for this proposition: methyltransferases were up-regulated (both families), 5'-  
301 nucleotidase, which converts adenosine monophosphate to adenosine, was down-regulated (F12),  
302 and methionine adenosyltransferases, which catalyze the formation of S-adenosylmethionine  
303 from methionine, were up-regulated (F10). Since the gene sets that affect hyper- and hypo-  
304 osmoregulation are different, changes in methylation states should be anticipated when  
305 transcription is compared between freshwater and seawater exposed fish. Observations from  
306 other species support these findings: seawater-induced changes in methylation states have been  
307 observed in brown trout (Moran et al., 2013), and transcription of the betain-homocysteine S-  
308 methyltransferase gene in ayu (*Plecoglossus altivelis*) gill is reduced after transfer from  
309 freshwater to brackish water (Lu et al., 2010). Thus, changes in methylation states are likely part  
310 of the physiological transition to seawater in anadromous fishes.

311  
312 Comparisons among transcriptional profiles for genes that are part of the same molecular  
313 pathways as inducible nitric oxide synthase (iNOS) provide clues about why immune response  
314 gene regulation coincides with elevated salinity and salinity tolerance capacity (Norman et al.,  
315 2014). Inducible nitric oxide synthase, highly up-regulated in core subset, produces nitric oxide  
316 (NO), a bio-signalling molecule that elicits many physiological responses (Pacher et al., 2007).  
317 NO produced by iNOS in particular, triggers an immune system response to pathogenic bacteria

318 and viruses (Lowenstein and Snyder, 1992). NO also increases the expression of cytochrome  
319 P450 (Zamora et al., 2001), which in turn, produces hydrogen peroxide that is catalyzed with  
320 chloride by myeloperoxidase (MPO) to produce hypochlorous acid (HOCl), a potent  
321 antimicrobial agent (Klebanoff, 2005). Interestingly, chloride availability may limit MPO  
322 activity (Pacher et al., 2007). If true, elevated plasma chloride levels may provide conditions  
323 that are conducive towards strengthening antimicrobial defence, which could have implications  
324 for ionoregulation, as hypochlorous acid production would necessitate chloride removal from  
325 blood plasma.

326

327 Elevated iNOS transcription likely fostered increased peroxynitrite formation, suggesting  
328 that further research about the putative impact and role of peroxynitrite in hypo-osmoregulation  
329 may be warranted. Peroxynitrite is a highly potent oxidizing compound formed from the  
330 spontaneous reaction of NO with superoxide (Huie and Padmaja, 1993). Although superoxide  
331 can be cytotoxic, it is detoxified by scavenging enzymes known as superoxide dismutases (SOD)  
332 (Pacher et al., 2007). In F12, SOD was down-regulated in seawater, suggesting that superoxide  
333 detoxification was reduced during hypo-osmoregulation. Moreover, superoxide detoxification  
334 by SOD is three times slower than peroxynitrite formation (Pohanka, 2013). Therefore increased  
335 superoxide levels combined with elevated NO production would likely result in increased  
336 peroxynitrite levels in seawater gill. Reduced transcription of SOD in high salinity tolerance  
337 capacity Arctic charr (Norman et al., 2014) also suggests that variation in salinity tolerance  
338 capacity may correlate with variation in peroxynitrite levels. Although peroxynitrite can protect  
339 against invading pathogens, it is also cytotoxic and can induce apoptosis and necrotic cell death  
340 (Pacher et al., 2007). Protection from pathogens would likely ease the transition to a hypo-  
341 osmoregulatory state, which can be metabolically demanding for salmonids (Rao, 1968;  
342 McCormick et al., 1989; Morgan and Iwama, 1999). Additionally, increased rates of cell death  
343 may accelerate cellular turnover in gill epithelia, where freshwater-type MRCs are replaced with  
344 seawater-type MRCs (McCormick et al., 2009). Hypomethylated DNA is also more susceptible  
345 to oxidative stress leading to increased rates of apoptosis and cellular turnover (James et al.,  
346 2002). Elevated cellular turnover may, in turn, more rapidly increase hypo-osmoregulatory  
347 capacity, conserving energy and mitigating the physiological stress conferred by a sub-optimal

348 osmoregulatory condition. Notably, peroxyne nitrite also modulates  $\text{Na}^+/\text{K}^+$ -ATPase activity via  
349 cysteine oxidation (Muriel and Sandoval, 2000; Varela et al., 2004).

350

351 While certain genes from the core subset have been implicated in hypo-osmoregulation  
352 by other studies, the majority are DE only in Arctic charr, providing limited support for the  
353 hypothesis that it is functionally conserved in other salmonids. We compared the results of this  
354 study with similar research on Atlantic salmon (Seear et al., 2010; Robertson and McCormick,  
355 2012) and sockeye salmon (Evans et al., 2011). Only nine genes in sockeye salmon (Evans et  
356 al., 2011) and seven genes in Atlantic salmon (Seear et al., 2010; Robertson and McCormick,  
357 2012) showed patterns of DE that were consistent with our observations (Table 6). It must be  
358 emphasized that differences in experimental design and in the technical platforms employed by  
359 others (Seear et al., 2010; Evans et al., 2011; Robertson and McCormick, 2012) may account for  
360 these differences.

361

362 The overrepresentation of up-regulated cell division genes suggests that MRC  
363 proliferation was occurring in the gill of seawater acclimating fish. Though short term (e.g., 5  
364 hours) acclimation to a hyper-osmotic environment is characterized by the transformation of  
365 freshwater- to seawater-type MRCs (Hiroi et al., 1999), long term (i.e., days to weeks)  
366 acclimation involves an increase in the number of MRCs (McCormick et al., 2001; Evans et al.,  
367 2005; Hwang and Lee, 2007). In the Atlantic salmon gill, the seawater isoform *ATP1 $\alpha$ 1b* occurs  
368 in separate MRCs than its freshwater counterpart, *ATP1 $\alpha$ 1a* (McCormick et al., 2009).  
369 Considering that seawater acclimation in salmonids entails elevated *ATP1 $\alpha$ 1b* expression  
370 (Richards et al., 2003; Mackie et al., 2005; Bystriansky et al., 2006; Nilsen et al., 2007; Larsen et  
371 al., 2008; Madsen et al., 2009; McCormick et al., 2009), and that tissue samples were collected  
372 10 days after transfer to seawater, it is plausible that the enrichment of up-regulated cell division  
373 genes could reflect the proliferation of *ATP1 $\alpha$ 1b*-type seawater MRCs. However, gill epithelium  
374 is composed of many different cell types, and pavement cells, which have a limited role in  
375 ionoregulation, comprise most of the epithelial surface area (> 90%), followed by MRCs (<  
376 10%) (Wilson and Laurent, 2002; Evans et al., 2005). Therefore cell division gene enrichment is  
377 also likely evidential of the proliferation of other cell types (see Wilson and Laurent, 2002). For  
378 instance, iNOS, which may have a role in hypo-osmoregulation, localizes to small cells buried

379 deep within gill filaments (Ebbesson et al., 2005). Enhanced expression of the methionine cycle,  
380 specifically, methionine adenosyltransferase, is also regarded as essential in regulating cell cycle  
381 turnover rates (Lin et al., 2014), which complements the results from this study (Fig. 5).  
382 Enrichment of up-regulated genes related to cell division GO categories has also been described  
383 for other teleosts: cell-cycle regulation in sea bass (Boutet et al., 2006), cellular processes in  
384 tilapia (Tine et al., 2008), and cell-cycle in goby (Evans and Somero, 2008).

385  
386 GO analyses suggest that the repression of developmental gene expression may be related  
387 to increased osmoregulatory stress. Overrepresentation of down-regulated genes was confined to  
388 a GO branch related to development (i.e., multicellular organismal development, system  
389 development, developmental processes, anatomical structure development, multicellular  
390 organismal process, and organ development). This appears paradoxical since cell division is  
391 integral to organ development and thus these processes would be expected to exhibit some  
392 congruency in expression. However, cellular turnover driven by senescence and apoptosis can  
393 occur independently of development (Pellettieri and Alvarado, 2007), while development  
394 necessitates cell division. Given that stress response genes were also up-regulated and  
395 overrepresented, we hypothesize that the stress induced by hyper-osmotic conditions may cause  
396 a repression of developmental gene expression. This would have to be temporary, however,  
397 perhaps until gill tissue and other ionoregulatory organs have transitioned to an optimal ion-  
398 excreting state, because the seawater phase of salmonid ontogeny is typically characterized by  
399 heightened growth rates. Repression of developmental gene expression may liberate energy for  
400 the transition of osmoregulatory tissues toward an ion-excreting state, as the metabolic demand  
401 of hypo-osmoregulation can be high, ranging from < 4% in cuthroat trout (*Oncorhynchus clarkii*  
402 *clarkii*) (Morgan and Iwama, 1999) to 30% in rainbow trout (Rao, 1968), and 20% of gill  
403 metabolism in Atlantic salmon (McCormick et al., 1989). To our knowledge, there are no data  
404 on the metabolic demands of hypo-osmoregulation in Arctic charr, although our hypothesis  
405 suggests that the cost would be high. The current study may have captured the transition period  
406 in gill physiology when hyper-osmoregulatory cells are being ablated prior to the metabolic  
407 machinery of hypo-osmoregulatory cells being fully activated.

408

409 Comparative genomics analyses provide support for the hypothesis that the  
410 relative location of salinity tolerance candidate genes along a chromosome is a feature of the  
411 genetic architecture of hypoosmoregulation. The physical clustering within linkage groups of  
412 DEGs in seawater gill tissue is consistent with previous observations in teleosts (Norman et al.,  
413 2012). The majority of genes that met our clustering criteria (i.e.,  $\leq 40$  kbp) were also identified  
414 as paired by previous research conducted on the same fish, but on a smaller scale (Norman et al.,  
415 2012). Furthermore, DEGs that align to certain stickleback chromosomes tend to have lower  
416 mean IGDs than the corresponding chromosomal-wide means, and several of these chromosomes  
417 are homologous with salinity tolerance QTL. For instance, Ga-I, which contains DEGs from F12  
418 that are on average 890 kbp closer together, is homologous with AC-4 and -12 (Norman et al.,  
419 2012), where salinity tolerance QTL have been localized in the same family (Norman et al.,  
420 2011). In addition, Ga-I not only contains two key genes from the seawater MRC model (i.e.,  
421 *ATP1 $\alpha$ 1b* and *CLDN10E*), but an inversion on this chromosome is correlated with disparity  
422 between marine and freshwater stickleback ecotypes (Jones et al., 2012). Interestingly, *ATP1 $\alpha$ 1b*  
423 is positioned within this inversion while *CLDN10E* is positioned outside of it. Consequently,  
424 *ATP1 $\alpha$ 1b* and *CLDN10E* are 1.007 Mb apart on Ga-I in the freshwater ecotype and 1.012 Mb  
425 apart in the marine ecotype, which suggests that ecotype development could be influenced by  
426 changes in the relative proximity of these two genes along the chromosome. Salinity tolerance  
427 QTL localized to Atlantic salmon linkage groups AS-5 and -22 are also homologous with Ga-I  
428 (Norman et al., 2012). Norman et al. (2012), hypothesized that the superior hypo-  
429 osmoregulatory capacity that is characteristic of Atlantic salmon (Hoar, 1988; Hiroi and  
430 McCormick, 2007) could be related to the formation of novel gene clusters by interchromosomal  
431 rearrangements. Thus, evidence suggests that a contingent of genes on Ga-I and their  
432 homologous counterparts in other species (e.g., Arctic charr and Atlantic salmon) may have  
433 implications for hypo-osmoregulation. Other stickleback chromosomes where DEGs are  
434 significantly closer than expected and that share homologous affinities with Arctic charr salinity  
435 tolerance QTL are AC-18 & Ga-V (F12), AC-4 & Ga-I (F10) and AC-31 & Ga-X (F10)  
436 (Norman et al., 2011).

437

438 The genetic architecture of hypo-osmoregulation in Arctic charr shows some evidence of  
439 large-scale structure. We found that stickleback synteny blocks on Arctic charr linkage groups

440 AC-1, AC-11 (henceforth referred to as AC-1/11, due to the strong homeologous affinities of  
441 these linkage groups (Danzmann et al., 2005; Timusk et al., 2011; Norman et al., 2012)), and  
442 AC-28 contain a greater number of DEGs than expected by chance. These linkage groups also  
443 contain QTL for the salinity tolerance performance traits  $\text{Na}^+/\text{K}^+$ -ATPase activity and growth in  
444 seawater (Norman et al., 2011), suggesting that these QTL could be the product of multiple  
445 genes containing *cis*-regulatory polymorphisms. This also suggests that some of the phenotypic  
446 variation attributed to QTL could stem from disparity in expression rate and transcript  
447 availability. In addition, stickleback chromosomes Ga-XVII and Ga-XIV share syntenic blocks  
448 with AC-1/11 and AC-28, respectively. Together with their respective homeologues, Ga-  
449 XVII&XII and Ga-XIII&XIV primarily originated from the ancestral L and I chromosome  
450 lineages of actinopterygian fishes, respectively (Kasahara et al., 2007; Nakatani et al., 2007;  
451 Norman et al., 2012), and were duplicated with the whole-genome duplication event in the  
452 teleost ancestor ~ 350 MYA (Christoffels et al., 2004). Comparisons with the teleost ancestor  
453 reveal that Ga-XVII&XII and Ga-XIII&XIV have been affected by very few interchromosomal  
454 rearrangements since the stickleback and teleost ancestral lineages diverged. Furthermore, the  
455 interchromosomal rearrangements that have occurred reflect translocations mostly between these  
456 homeologous pairs. Ga-XVII (orthologous with ancestral chromosome L), contains a 575 kbp  
457 segment that is homologous with Ga-XIII (orthologous with ancestral chromosome I), which  
458 localizes to the AC-1/11 and Ga-XVII synteny block (Norman et al., 2012). Close inspection of  
459 this region reveals that a single gene, tubulin polyglutamylase complex subunit 2 (*TPGS2*), was  
460 DE in seawater. These findings suggest that interchromosomal rearrangements between  
461 orthologues of L and I in the most recent common ancestor of stickleback and Arctic charr could  
462 have contributed to the apparent large-scale structure of AC-1/11. Furthermore, this suggests  
463 that interchromosomal rearrangements may have played a role in the evolution of hypo-  
464 osmoregulation in Arctic charr, and is consistent with the findings of Norman et al. (2012), who  
465 found that interchromosomal rearrangements produced a coalescence of salinity tolerance  
466 candidate genes on certain chromosomes in Atlantic salmon, which they hypothesized could  
467 contribute to the high salinity tolerance capacity of that species. Further research is necessary to  
468 test these hypotheses.

469

470 This study characterized changes in gene expression profiles and biological processes  
471 that occurred in Arctic charr gill tissue during seawater acclimation. Gene expression profiles of  
472 major transporters from the seawater MRC complex were consistent with previous research for  
473 one family, and inconsistent for the other family. Despite these differences a subset of DEGs in  
474 both families showed a remarkable consistency in both magnitude and direction of expression.  
475 We hypothesized that this subset may be comprised of genes that have a limited capacity for  
476 plasticity in expression which may be integral for hypo-osmoregulation in Arctic charr.  
477 Examination of these genes suggested that in seawater exposed fish methylation states were  
478 changing and that peroxynitrite formation and antimicrobial defence may have implications for  
479 hypo-osmoregulation. Based on patterns from GO, we postulated that the enrichment of cell  
480 division genes could reflect the proliferation of *ATP1 $\alpha$ 1b*-type seawater MRCs, and that the  
481 stress induced by hyper-osmotic conditions may have caused a repression of developmental gene  
482 expression. Our findings provide additional support for previous research that suggests the  
483 relative proximity among a contingent of genes on Ga-I has important implications for hypo-  
484 osmoregulation. We also found that clustering patterns of DEGs were consistent with previous  
485 observations in salmonids and other teleosts, and that AC-1/11 and AC-28 show evidence of  
486 large-scale structure for hypo-osmoregulation candidate genes. Finally, we provided evidence  
487 that interchromosomal rearrangements have played a role in the evolution of hypo-  
488 osmoregulation in Arctic charr.

489

## 490 **MATERIALS AND METHODS**

### 491 **Strain background and rearing**

492 Two full-sib Arctic charr, families (F10 and F12) were created from fish descended from  
493 the anadromous population resident in the Fraser River in Labrador, Canada. Crosses were made  
494 in November of 2006 at the Coastal Zones Research Institute, Shippagan, New Brunswick  
495 (Canada). Eight months after hatching, 150 progeny per family were implanted with passive  
496 integrated transponder tags and transferred to St. Andrews Biological Station, St. Andrews, New  
497 Brunswick (Canada). There they were held in 1 m<sup>3</sup> freshwater tanks and reared under controlled  
498 simulated-natural conditions for photoperiod and water temperature. Tanks contained filtered  
499 and aerated freshwater (9.9-10.7°C, flow rate 18 L·min<sup>-1</sup>, dissolved O<sub>2</sub> 10.0-10.6 mg·L<sup>-1</sup>). For  
500 the duration of sampling (i.e., June 9, 2008 to July 6, 2008) a 16 h:8 h light:dark photoperiod



501 regime was employed to minimize the confounding effects associated with a naturally changing  
502 photoperiod (for details see Norman et al., 2011). All experiments were carried out in  
503 accordance with the Canadian Council for Animal Care Guidelines under the University of  
504 Guelph Animal Care Committee approved protocol number 08R033.

505

### 506 **Experimental protocol and sample selection**

507 The salinity tolerance trials were conducted during June, 2008. Freshwater was replaced  
508 with 100% filtered seawater (salinity 31,000-33,000 mg·L<sup>-1</sup>, 10.5-11.9°C, flow rate 18 L·min<sup>-1</sup>,  
509 dissolved O<sub>2</sub> 8.1-11.4 mg·L<sup>-1</sup>) over 24 hours. After ten days exposure to full strength seawater  
510 non-lethal gill tissue biopsies (McCormick et al., 1993) were collected for 50 fish per family.  
511 Samples were also collected from freshwater fish at this time. Each sample consisted of  
512 approximately 3-6 primary filaments, which were stored in 1 mL of RNAlater (Life  
513 Technologies) at 4°C for 24-hours, then transferred to -20°C for long-term storage. To compare  
514 expression profiles in gill tissue between fish exposed to seawater and freshwater, we selected  
515 six fish from seawater and three fish from freshwater from each family for mRNA sequencing  
516 (N=18). Notably, the same seawater-exposed fish used for this study were also used for a  
517 companion study, and thus were comprised of individuals that exhibited the greatest and least  
518 number of salinity tolerance QTL (see Norman et al. 2014).

519

### 520 **RNA extraction and sequencing**

521 Immediately prior to homogenization, gill tissue samples were removed from RNAlater  
522 and rinsed. Trizol reagent (Life Technologies) was used to extract total RNA according to the  
523 manufacturer's instructions. A disposable pestle grinder system (Thermo Fisher Scientific,  
524 Waltham, Massachusetts, USA) was used to homogenize tissue immersed in 1 mL Trizol. Purity  
525 of extracted total RNA was assessed with a NanoDrop 8000 spectrophotometer (Thermo Fisher  
526 Scientific, Waltham, Massachusetts, USA). For further details regarding sample preparation, we  
527 refer the reader to Norman et al. (2014). The Bio-Rad Experion system (Bio-Rad, Hercules,  
528 California, USA) was employed to assess RNA integrity. Only samples with an RNA quality  
529 index (RQI) of 8.0 or greater were submitted for mRNA sequencing. mRNA libraries were  
530 constructed separately for all 18 fish. Illumina sequencing was performed by the Clinical  
531 Genomics Centre (Mount Sinai Hospital, Toronto, Ontario, Canada). Sequencing libraries were

532 created according to the manufacturer's instructions (Illumina). Briefly, poly-A mRNA was  
533 isolated from total RNA and purified using poly-T oligo-attached magnetic beads. mRNA was  
534 fragmented into pieces using divalent cations under elevated temperature, and copied into cDNA  
535 using reverse transcriptase and random primers. Following the ligation of adaptors, cDNA  
536 templates were purified and amplified with PCR. Sequencing was performed with a HiSeq 2000  
537 instrument (Illumina, San Diego, California, USA) and subjected to 100 cycles of paired-end  
538 sequencing. Image analysis, base-calling and quality value calculation were performed using  
539 Illumina's sequence analysis software, Casava (v1.8.2). The raw reads are available from the  
540 Sequence Read Archive (SRA) at the National Centre for Biotechnology Information (NCBI),  
541 under BioProject accession #SRP026259 and BioSample accession #SRS452215.

542

### 543 **Quality control and de novo transcriptome construction**

544 The procedures used for read pre-processing, the measures taken for quality control, and  
545 the steps for *de novo* construction of the reference transcriptome are described in detail by  
546 Norman et al., (2014). Briefly, the reads used to quantify expression were filtered and trimmed  
547 according to quality scores using FastQC and Trimmomatic software (Andrews 2010; Lohse et  
548 al., 2012). To facilitate de novo assembly, reads with rare k-mers, low quality reads, and  
549 identical reads were removed using Rnnotator (Martin et al., 2010). The Velvet-Oases software  
550 pipeline was employed to generate a single merged assembly from multiple assemblies spanning  
551 a range of k-mers. Redundancy in the merged assembly was reduced using CD-HIT-EST (Li  
552 and Godzik, 2006), producing a final consensus assembly of 108,645 contigs.

553

### 554 **Differential expression analysis and sequence annotation**

555 Read alignment to the reference transcriptome was conducted with RNA-Seq by  
556 Expectation Maximization (RSEM) (Li and Dewey, 2011). RSEM performs accurate transcript  
557 quantification when a reference genome is unavailable. It also allows for the inclusion of non-  
558 uniquely mapping reads in abundance estimates through the use of a statistical model that  
559 accounts for read mapping uncertainty. Since scaffolding was not used during assembly with  
560 Velvet-Oases, paired-end reads could not be used for accurate expression quantification.  
561 Accordingly, only forward reads were mapped since they typically yielded higher quality scores  
562 than reverse reads. Differential expression between fish exposed to seawater and freshwater was

563 analyzed separately for each family, using EBSeq (Leng et al., 2013). This software employs an  
564 empirical Bayes hierarchical model that accommodates read mapping uncertainty from RSEM.  
565 To account for differences in library size, the number of reads in each sample was adjusted by  
566 median normalization (Anders and Huber, 2010; Leng et al., 2013). Differential expression was  
567 established at a threshold of  $P \leq 0.05$  and a B-H False Discovery Rate of  $\alpha = 0.05$  (Sokal and  
568 Rohlf, 1995). Linear regression was employed using SPSS 16 (IBM) to compare the magnitude  
569 and direction of expression ratios for genes that were DE in both families.  
570 Sequences were annotated using Blast2GO (Gotz et al., 2008). The single best alignment for  
571 each contig was obtained using BLASTX against the non-redundant protein sequence database at  
572 NCBI at an E-value threshold of  $1E-5$ .

573

### 574 **Gene Ontology analysis**

575 The Biological Networks GO tool (BiNGO) (Maere et al., 2005) was used to perform  
576 hypergeometric and B-H False Discovery Rate tests ( $\alpha = 0.05$ ) to identify overrepresented GO  
577 categories under the Biological Processes umbrella. Independent tests were conducted for each  
578 family for up-regulated and down-regulated genes. Data were entered in the form of official  
579 gene symbols and tests were run against the annotated reference *de novo* constructed  
580 transcriptome. All annotations were obtained from *Homo sapiens*. Fisher's exact tests followed  
581 by B-H False Discovery Rate tests ( $\alpha = 0.05$ ) were performed to determine whether any GO  
582 categories contained different quantities of genes between families. These tests were done for  
583 up-regulated and down-regulated gene groups independently.

584

### 585 **Characterization of differentially expressed gene clusters**

586 BLAST+ (v2.2.26) (Camacho et al., 2009) was used to align all contigs showing DE  
587 between seawater and freshwater groups to a database of cDNA sequences for protein-coding  
588 genes in stickleback using the same alignment criteria noted previously (Ensembl v68) (Flicek et  
589 al., 2013; Jones et al., 2012). Based on a synteny map of Arctic charr and stickleback (Norman  
590 et al., 2012), patterns between gene location and DE were assessed to ascertain the extent that  
591 DEGs cluster along Arctic charr chromosomes. Genes were considered clustered if their coding  
592 regions were within 40 kbp of one another on a stickleback chromosome (Ng et al., 2009), as Ng

593 et al. (2009) detected a significant negative correlation ( $R^2 = 0.50$ ) between gene coexpression  
594 and IGD in zebrafish, which was strongest ( $R^2 = 0.79$ ) for genes 10 to 40 kbp apart.

595

### 596 **Comparing the relative proximity of differentially expressed genes**

597 To test whether DEGs were located in closer proximity to one another along a  
598 chromosome, permutation analysis was performed using the R statistical language (R Core Team  
599 2013). The analysis included all of the DEGs that aligned to the stickleback genome. Tests were  
600 conducted independently for each chromosome. The IGDs among all genes on a chromosome  
601 were pooled with those from the DEGs that aligned to that chromosome. The difference between  
602 means was estimated between a random sample of the pooled data and the remaining non-  
603 sampled data over 10,000 iterations. The size of each random sample was equal to the number  
604 of DEGs that aligned to the chromosome in question. The observed mean difference was then  
605 compared to the distribution of mean differences from the 10,000 random samples. Significance  
606 was denoted for  $P \leq 0.05$  following a B-H False Discovery Rate test to correct for multiple tests  
607 (Sokal and Rohlf, 1995). This analysis assumes that the relative proximity and distribution of  
608 genes located on stickleback chromosomes are conserved on Arctic charr chromosomes. We  
609 acknowledge that this may not be realistic across entire chromosomes, however, conserved  
610 synteny blocks between stickleback and Arctic charr chromosomes have been described  
611 (Norman et al., 2012).

612

### 613 **Testing for enrichment of differentially expressed genes in synteny blocks**

614 To determine if the quantity of DEGs in each of the Arctic charr -stickleback synteny  
615 blocks was greater than expected, two-tailed chi-squared tests of association were performed  
616 using 2X2 contingency tables. This test is an expansion of the analysis originally performed and  
617 described in detail by Norman et al. (2013). Briefly, for each synteny block and family, tests  
618 compared the quantity of genes showing significant DE in a synteny block and the total quantity  
619 of genes contained within that synteny block, with the quantity of genes in these two classes that  
620 were not contained within the synteny block. These tests assumed that the composition of genes  
621 within synteny blocks was not different between Arctic charr and stickleback. An adjustment to  
622 correct for multiple tests was done using a B-H False Discovery Rate test ( $\alpha = 0.05$ ) (Sokal and  
623 Rohlf, 1995).

624

**625 Physiological responses to gene expression data**

626 The sample size was not large enough to warrant statistical analyses of covariation  
627 between gene expression and salinity tolerance phenotypes. However, in a previous study with  
628 the same fish (Norman et al. 2011), significant associations were found between variation in gill  
629 filament  $\text{Na}^+/\text{K}^+$ -ATPase activity and blood plasma osmolality with genetic variation on several  
630 Arctic charr linkage groups (i.e., chromosomes). Given that the fish chosen for this study were  
631 those individuals with the greatest and least number of salinity tolerance QTL, and considering  
632 that a QTL represents a statistical association between phenotypic variation and genetic  
633 variation, changes in gene expression are related to physiological responses.

634

**635 ACKNOWLEDGEMENTS**

636 The authors acknowledge Claude Pelletier of the Coastal Zones Research Institute for  
637 generating the family crosses and Brian Glebe, Steven Leadbeater, and Wilfred Young-Lai for  
638 overseeing the rearing and maintenance of fish at St. Andrews Biological Station. We also thank  
639 Xuejiang (Roger) Shi of the Clinical Genomics Centre at Mount Sinai Hospital for overseeing  
640 the mRNA sequencing. Special thanks to Xia Yue, Andrea Kocmarek, and Jing Zhang for help  
641 and advice in the laboratory. We also thank two anonymous reviewers for their comments,  
642 which improved the quality of the manuscript.

643

**644 COMPETING INTERESTS**

645 The authors declare no competing financial interests.

646

**647 AUTHOR CONTRIBUTIONS**

648 All authors contributed to the conception and design of research. J.D.N. performed  
649 experiments, analyzed data, interpreted results of experiments, prepared figures and drafted the  
650 manuscript. All authors edited, revised, and approved the final version of the manuscript.

651

**652 FUNDING**

653 This work was supported by a Natural Science and Engineering Research Council of  
654 Canada (NSERC) grant.

655

## 656 REFERENCES

- 657 **Allendorf, F. and Thorgaard, G.** (1984). Tetraploidy and the evolution of salmonid fishes. In  
658 *Evolutionary Genetics of Fishes*, (ed. B.J. Turner), pp. 1-46. New York: Plenum Press.
- 659 **Anders, S. and Huber, W.** (2010). Differential expression analysis for sequence count data.  
660 *Genome Biol.* **11**, R106.
- 661 **Andrews S.** (2010). FASTQC: A quality control tool for high throughput sequence data [Online]  
662 <http://www.bioinformatics.babraham.ac.uk/projects/fastqc>.
- 663 **Aykanat, T., Thrower, F. P. and Heath, D. D.** (2011). Rapid evolution of osmoregulatory  
664 function by modification of gene transcription in steelhead trout. *Genetica* **139**, 233-242.
- 665 **Boutet, I., Ky, C. L. L. and Bonhomme, F.** (2006). A transcriptomic approach of salinity  
666 response in the euryhaline teleost, *Dicentrarchus labrax*. *Gene* **379**, 40-50.
- 667 **Bystriansky, J. S., Richards, J. G., Schulte, P. M. and Ballantyne, J. S.** (2006). Reciprocal  
668 expression of gill Na<sup>+</sup>/K<sup>+</sup>-ATPase alpha-subunit isoforms alpha 1a and alpha 1b during  
669 seawater acclimation of three salmonid fishes that vary in their salinity tolerance. *J. Exp. Biol.*  
670 **209**, 1848-1858.
- 671 **Camacho, C., Coulouris, G., Avagyan, V., Ma, N., Papadopoulos, J., Bealer, K. and**  
672 **Madden, T. L.** (2009). BLAST plus : architecture and applications. *BMC Bioinformatics* **10**,  
673 421.
- 674 **Chen, J. M., Cutler, C., Jacques, C., Boeuf, G., Denamur, E., Lecointre, G., Mercier, B.,**  
675 **Cramb, G. and Ferec, C.** (2001). A combined analysis of the cystic fibrosis transmembrane  
676 conductance regulator: Implications for structure and disease models. *Mol. Biol. Evol.* **18**, 1771-  
677 1788.
- 678 **Christoffels, A., Koh, E. G. L., Chia, J. M., Brenner, S., Aparicio, S. and Venkatesh, B.**  
679 (2004). Fugu genome analysis provides evidence for a whole-genome duplication early during  
680 the evolution of ray-finned fishes. *Mol. Biol. Evol.* **21**, 1146-1151.
- 681 **Cutler, C. P. and Cramb, G.** (2002). Two isoforms of the Na<sup>+</sup>/K<sup>+</sup>/2Cl<sup>-</sup> cotransporter are  
682 expressed in the European eel (*Anguilla anguilla*). *BBA Biomembranes* **1566**, 92-103.
- 683 **Danzmann, R. G., Cairney, M., Davidson, W. S., Ferguson, M. M., Gharbi, K., Guyomard,**  
684 **R., Holm, L. E., Leder, E., Okamoto, N., Ozaki, A. et al.,** (2005). A comparative analysis of  
685 the rainbow trout genome with 2 other species of fish (Arctic charr and Atlantic salmon) within  
686 the tetraploid derivative Salmonidae family (subfamily : Salmoninae). *Genome* **48**, 1037-1051.
- 687 **Delabbio, J. L., Glebe, B. D. and Sreedharan, A.** (1990). Variation in growth and  
688 survival between 2 anadromous strains of Canadian Arctic charr (*Salvelinus alpinus*) during  
689 long-term saltwater rearing. *Aquaculture* **85**, 259-270.
- 690 **Ebbesson, L. O. E., Tipsmark, C. K., Holmqvist, B., Nilsen, T., Andersson, E., Stefansson,**  
691 **S. O., and Madsen, S. S.** (2005). Nitric oxide in the gill of Atlantic salmon: colocalization with  
692 and inhibition of Na<sup>+</sup>,K<sup>+</sup>-ATPase. *J. Exp. Biol.* **280**, 1011-1017.
- 693 **Engelund, M. B., Yu, A. S. L., Li, J., Madsen, S. S., Faergeman, N. J. and Tipsmark, C. K.**  
694 (2012). Functional characterization and localization of a gill-specific claudin isoform in Atlantic  
695 salmon. *Am. J. Physiol.-Reg. I.* **302**, R300-R311.

- 696 **Evans, D. H., Piermarini, P. M. and Choe, K. P.** (2005). The multifunctional fish gill:  
697 Dominant site of gas exchange, osmoregulation, acid-base regulation, and excretion of  
698 nitrogenous waste. *Physiol. Rev.* **85**, 97-177.
- 699 **Evans, T. G. and Somero, G. N.** (2008). A microarray-based transcriptomic time-course of  
700 hyper- and hypo-osmotic stress signaling events in the euryhaline fish *Gillichthys mirabilis*:  
701 osmosensors to effectors. *J. Exp. Biol.* **211**, 3636-3649.
- 702 **Evans, T. G., Hammill, E., Kaukinen, K., Schulze, A. D., Patterson, D. A., English, K. K.,**  
703 **Curtis, J. M. R. and Miller, K. M.** (2011). Transcriptomics of environmental acclimatization  
704 and survival in wild adult Pacific sockeye salmon (*Oncorhynchus nerka*) during spawning  
705 migration. *Mol. Ecol.* **20**, 4472-4489.
- 706 **Flicek, P., Ahmed, I., Amode, M. R., Barrell, D., Beal, K., Brent, S., Carvalho-Silva, D.,**  
707 **Clapham, P., Coates, G., Fairley, S. et al.,** (2013). Ensembl 2013. *Nucleic Acids Res.* **41**, D48-  
708 D55.
- 709 **Furuse, M., Furuse, K., Sasaki, H. and Tsukita, S.** (2001). Conversion of Zonulae occludentes  
710 from tight to leaky strand type by introducing claudin-2 into Madin-Darby canine kidney I cells.  
711 *J. Cell Biol.* **153**, 263-272.
- 712 **Gotz, S., Garcia-Gomez, J. M., Terol, J., Williams, T. D., Nagaraj, S. H., Nueda, M. J.,**  
713 **Robles, M., Talon, M., Dopazo, J. and Conesa, A.** (2008). High-throughput functional  
714 annotation and data mining with the Blast2GO suite. *Nucleic Acids Res.* **36**, 3420-3435.
- 715 **Hiroi, J. and McCormick, S. D.** (2007). Variation in salinity tolerance, gill Na<sup>+</sup>/K<sup>+</sup>-ATPase,  
716 Na<sup>+</sup>/K<sup>+</sup>/2Cl<sup>-</sup> cotransporter and mitochondria-rich cell distribution in three salmonids  
717 *Salvelinus namaycush*, *Salvelinus fontinalis* and *Salmo salar*. *J. Exp. Biol.* **210**, 1015-1024.
- 718 **Hiroi, J., Yasumasu, S., McCormick, S. D., Hwang, P.-P. and Kaneko, T.** (2008). Evidence  
719 for an apical Na-Cl cotransporter involved in ion uptake in a teleost fish. *J. Exp. Biol.* **211**, 2584-  
720 2599.
- 721 **Hiroi, J., Kaneko, T. and Tanaka, M.** (1999). In vivo sequential changes in chloride cell  
722 morphology in the yolk-sac membrane of Mozambique tilapia (*Oreochromis mossambicus*)  
723 embryos and larvae during seawater adaptation. *J. Exp. Biol.* **202**, 3485-3495.
- 724 **Hoar, W.** (1988). The physiology of smolting salmonids. In *Fish Physiology, vol. XIV* (eds. W.  
725 Hoar and D. Randall), pp. 275-343. New York: Academic Press.
- 726 **Hoffman, D. R., Marion, D. W., Cornatzer, W. E., and Duerre, J. A.** (1980). S-  
727 adenosylmethionine and S-adenosylhomocysteine metabolism in isolated rat liver. *J. Biol. Chem.*  
728 **255**, 10822-10827.
- 729 **Huie, R. E., and Padjama, S.** (1993). The reaction of NO with superoxide. *Free Radical Res.*  
730 **18**, 195-199.
- 731 **Hurst, L. D., Pal, C. and Lercher, M. J.** (2004). The evolutionary dynamics of eukaryotic gene  
732 order. *Nat. Rev. Genet.* **5**, 299-310.
- 733 **Hwang, P.-P. and Lee, T.-H.** (2007). New insights into fish ion regulation and mitochondrion-  
734 rich cells. *Comp. Biochem. Phys. A* **148**, 479-497.

- 735 **Jaillon, O., Aury, J. M., Brunet, F., Petit, J. L., Stange-Thomann, N., Mauceli, E., Bouneau,**  
736 **L., Fischer, C., Ozouf-Costaz, C., Bernot, A. et al.,** (2004). Genome duplication in the teleost  
737 fish *Tetraodon nigroviridis* reveals the early vertebrate proto-karyotype. *Nature* **431**, 946-957.
- 738 **James, S. J., Melnyk, S., Pogribna, M., Pogribny, I. P., and Caudill, M. A.** (2002). Elevation  
739 in S-adenosylhomocysteine and DNA hypomethylation: potential epigenetic mechanisms for  
740 homocysteine-related pathology. *J. Nutr.* **132**, 2361S-2366S.
- 741 **Jones, F. C., Grabherr, M. G., Chan, Y. F., Russell, P., Mauceli, E., Johnson, J., Swofford,**  
742 **R., Pirun, M., Zody, M. C., White, S. et al.,** (2012). The genomic basis of adaptive evolution in  
743 threespine sticklebacks. *Nature* **484**, 55-61.
- 744 **Kalujnaia, S., McWilliam, I. S., Zaguinaiko, V. A., Feilen, A. L., Nicholson, J., Hazon, N.,**  
745 **Cutler, C. P. and Cramb, G.** (2007). Transcriptomic approach to the study of osmoregulation in  
746 the European eel *Anguilla anguilla*. *Physiol. Genomics* **31**, 385-401.
- 747 **Kasahara, M., Naruse, K., Sasaki, S., Nakatani, Y., Qu, W., Ahsan, B., Yamada, T.,**  
748 **Nagayasu, Y., Doi, K., Kasai, Y. et al.,** (2007). The medaka draft genome and insights into  
749 vertebrate genome evolution. *Nature* **447**, 714-719.
- 750 **Kang, C.-K., Tsai, H.-J., Liu, C.-C., Lee, T.-H. and Hwang, P.-P.** (2010). Salinity-dependent  
751 expression of a Na<sup>+</sup>, K<sup>+</sup>, 2Cl<sup>-</sup> cotransporter in gills of the brackish medaka *Oryzias dancena*:  
752 A molecular correlate for hyposmoregulatory endurance. *Comp. Biochem. Phys. A* **157**, 7-18.
- 753 **Klebanoff, S. J.** (2005). Myeloperoxidase: friend or foe. *J. Leukocyte Biol.* **77**, 598-625.
- 754 **Larsen, P. F., Nielsen, E. E., Koed, A., Thomsen, D. S., Olsvik, P. A. and Loeschcke, V.**  
755 (2008). Interpopulation differences in expression of candidate genes for salinity tolerance in  
756 winter migrating anadromous brown trout (*Salmo trutta* L.). *BMC Genet.* **9**, 12.
- 757 **Le Bras, Y., Dechamp, N., Krieg, F., Filangi, O., Guyomard, R., Boussaha, M., Bovenhuis,**  
758 **H., Pottinger, T. G., Prunet, P., Le Roy, P. et al.,** (2011). Detection of QTL with effects on  
759 osmoregulation capacities in the rainbow trout (*Oncorhynchus mykiss*). *BMC Genet.* **12**, 46.
- 760 **Leng, N., Dawson, J. A., Thomson, J. A., Ruotti, V., Rissman, A. I., Smits, B. M. G., Haag,**  
761 **J. D., Gould, M. N., Stewart, R. M. and Kendzierski, C.** (2013). EBSeq: an empirical Bayes  
762 hierarchical model for inference in RNA-seq experiments. *Bioinformatics* **29**, 1035-1043.
- 763 **Li, B. and Dewey, C. N.** (2011). RSEM: accurate transcript quantification from RNA-Seq data  
764 with or without a reference genome. *BMC Bioinformatics* **12**, 323.
- 765 **Li, W. and Godzik, A.** (2006). Cd-hit: a fast program for clustering and comparing large sets of  
766 protein or nucleotide sequences. *Bioinformatics* **22**, 1658-1659.
- 767 **Lin, D. W., Chung, B. P., and Kaiser, P.** (2014). S-adenosylmethionine limitation induces p38  
768 mitogen-activated protein kinase and triggers cell cycle arrest in G1. *J. Cell Sci.* **127**, 50-59.
- 769 **Lohse, M., Bolger, A. M., Nagel, A., Fernie, A. R., Lunn, J. E., Stitt, M. and Usadel, B.**  
770 (2012). RobiNA: a user-friendly, integrated software solution for RNA-Seq-based  
771 transcriptomics. *Nucleic Acids Res.* **40**, W622-W627.
- 772 **Lorin-Nebel, C. and Charmantier, G.** (2007). The ontogeny of osmoregulation in teleosts.  
773 *Oceanis S. D.* **30**, 349-384.



- 774 **Lowenstein, C. J., and Snyder, S. H.** (1992). Nitric oxide, a novel biologic messenger. *Cell* **70**,  
775 705-707.
- 776 **Lu, J. X., Chen, J., Huang, Z. A., Shi, Y. H., Wang, F.** (2010). Proteomic analysis on the  
777 alteration of protein expression in gills of ayu (*Plecoglossus altivelis*) associated with salinity  
778 change. *Comp. Biochem. Phys. D* **5**, 185-189.
- 779 **Mackie, P., Wright, P. A., Glebe, B. D. and Ballantyne, J. S.** (2005). Osmoregulation and  
780 gene expression of Na<sup>+</sup>/K<sup>+</sup> ATPase in families of Atlantic salmon (*Salmo salar*) smolts. *Can. J.*  
781 *Fish. Aquat. Sci.* **62**, 2661-2672.
- 782 **Mackie, P. M., Gharbi, K., Ballantyne, J. S., McCormick, S. D. and Wright, P. A.** (2007).  
783 Na<sup>+</sup>/K<sup>+</sup>/2Cl<sup>-</sup> cotransporter and *CFTR* gill expression after seawater transfer in smolts (0(+)) of  
784 different Atlantic salmon (*Salmo salar*) families. *Aquaculture* **272**, 625-635.
- 785 **Madsen, S. S., Kiilerich, P. and Tipsmark, C. K.** (2009). Multiplicity of expression of  
786 Na<sup>(+)</sup>,K<sup>(+)</sup>-ATPase alpha-subunit isoforms in the gill of Atlantic salmon (*Salmo salar*): cellular  
787 localisation and absolute quantification in response to salinity change. *J. Exp. Biol.* **212**, 78-88.
- 788 **Maere, S., Heymans, K. and Kuiper, M.** (2005). BiNGO: a Cytoscape plugin to assess  
789 overrepresentation of Gene Ontology categories in biological networks. *Bioinformatics* **21**, 3448-  
790 3449.
- 791 **Marshall, W. and Grosell, M.** (2006). Ion transport, osmoregulation, and acid-base balance. In  
792 *The Physiology of Fishes*, (eds. D. Evans and J. Claiborne), pp. 177-230. Boca Raton, FL: CRC  
793 Press.
- 794 **Martin, J., Bruno, V. M., Fang, Z., Meng, X., Blow, M., Zhang, T., Sherlock, G., Snyder,**  
795 **M. and Wang, Z.** (2010). Rnnotator: an automated de novo transcriptome assembly pipeline  
796 from stranded RNA-Seq reads. *BMC Genomics* **11**, 663.
- 797 **McCormick, S. D.** (1993). Methods for nonlethal gill biopsy and measurement of Na<sup>+</sup>,K<sup>+</sup>-  
798 ATPase activity. *Can. J. Aquat. Sci.* **50**, 656-658.
- 799 **McCormick, S. D.** (2001). Endocrine control of osmoregulation in teleost fish. *Am. Zool.* **41**,  
800 781-794.
- 801 **McCormick, S. D., Moyes, C. D. and Ballantyne, J. S.** (1989). Influence of salinity on the  
802 energetics of gill and kidney of Atlantic salmon (*Salmo salar*). *Fish Physiol. Biochem.* **6**, 243-  
803 254.
- 804 **McCormick, S. D., Regish, A. M. and Christensen, A. K.** (2009). Distinct freshwater and  
805 seawater isoforms of Na<sup>(+)</sup>/K<sup>(+)</sup>-ATPase in gill chloride cells of Atlantic salmon. *J. Exp. Biol.*  
806 **212**, 3994-4001.
- 807 **McGowan, P. O., Suderman, M., Sasaki, A., Huang, T. C. T., Hallett, M., Meaney, M. J.**  
808 **and Szyf, M.** (2011). Broad epigenetic signature of maternal care in the brain of adult rats. *PLOS*  
809 *One* **6**, 2.
- 810 **Moran, P., Francisco, M. R., Megias, M., Covelo-Soto, L., and Perez-Figueroa, A.** (2013).  
811 Environmental induced methylation changes associated with seawater adaptation in brown trout.  
812 *Aquaculture* **392-395**, 77-83.

- 813 **Morgan, J. D. and Iwama, G. K.** (1999). Energy cost of NaCl transport in isolated gills of  
814 cutthroat trout. *Am. J. Physiol.-Reg. I* **277**, R631-R639.
- 815 **Muriel, P. and Sandoval, G.** (2000). Nitric oxide and peroxynitrite anion modulate liver plasma  
816 membrane fluidity and Na<sup>+</sup>/K<sup>+</sup>-ATPase activity. *Nitric Oxide-Biol. Ch.* **4**, 333-342.
- 817 **Nakatani, Y., Takeda, H., Kohara, Y. and Morishita, S.** (2007). Reconstruction of the  
818 vertebrate ancestral genome reveals dynamic genome reorganization in early vertebrates.  
819 *Genome Res.* **17**, 1254-1265.
- 820 **Ng, Y. K., Wu, W. and Zhang, L.** (2009). Positive correlation between gene coexpression and  
821 positional clustering in the zebrafish genome. *BMC Genomics* **10**, 42.
- 822 **Nilsen, T. O., Ebbesson, L. O. E., Madsen, S. S., McCormick, S. D., Andersson, E.,  
823 Bjornsson, B. T., Prunet, P. and Stefansson, S. O.** (2007). Differential expression of gill  
824 Na<sup>+</sup>,K<sup>+</sup>-ATPase alpha- and beta-subunits, Na<sup>+</sup>,K<sup>+</sup>,2Cl<sup>-</sup> cotransporter and CFTR anion channel  
825 in juvenile anadromous and landlocked Atlantic salmon *Salmo salar*. *J. Exp. Biol.* **210**, 2885-  
826 2896.
- 827 **Norman, J. D., Danzmann, R. G., Glebe, B. and Ferguson, M. M.** (2011). The genetic basis  
828 of salinity tolerance in Arctic charr (*Salvelinus alpinus*). *BMC Genet.* **12**, 81.
- 829 **Norman, J. D., Robinson, M., Glebe, B., Ferguson, M. M. and Danzmann, R. G.** (2012).  
830 Genomic arrangement of salinity tolerance QTLs in salmonids: A comparative analysis of  
831 Atlantic salmon (*Salmo salar*) with Arctic charr (*Salvelinus alpinus*) and rainbow trout  
832 (*Oncorhynchus mykiss*). *BMC Genomics* **13**, 420.
- 833 **Norman, J. D., Ferguson, M. M., and Danzmann, R. G.** (2014). Transcriptomics of salinity  
834 tolerance capacity in Arctic charr (*Salvelinus alpinus*): A comparison of gene expression profiles  
835 between divergent QTL genotypes. *Physiol. Genomics* **46**, 123-137.
- 836 **Pacher, P., Beckman, J. S., and Liaudet, L.** (2007). Nitric oxide and peroxynitrite in health  
837 and disease. *Physiol. Rev.* **87**, 315-424.
- 838 **Pellettieri, J. and Alvarado, A. S.** (2007). Cell turnover and adult tissue homeostasis: From  
839 humans to planarians. *Annu. Rev. Genet.* **41**, 83-105.
- 840 **Pohanka, M.** (2013). Role of oxidative stress in infectious diseases. *Folia Microbiol.* **58**, 503-  
841 513.
- 842 **Quackenbush, J., Cho, J., Lee, D., Liang, F., Holt, I., Karamycheva, S., Parvizi, B., Perte, G.,  
843 Sultana, R. and White, J.** (2001). The TIGR Gene Indices: analysis of gene transcript  
844 sequences in highly sampled eukaryotic species. *Nucleic Acids Res.* **29**, 159-164.
- 845 **R Core Team.** (2013). R: A language and environment for statistical computing. R Foundation  
846 for Statistical Computing, Vienna, Austria. URL <http://www.R-project.org/>.
- 847 **Rao, G. M. M.** (1968). Oxygen consumption of rainbow trout (*Salmo gairdneri*) in relation to  
848 activity and salinity. *Can. J. Zool.* **46**, 781.
- 849 **Richards, J. G., Semple, J. W., Bystriansky, J. S. and Schulte, P. M.** (2003). Na<sup>+</sup>/K<sup>+</sup>-ATPase  
850 (alpha-isoform switching in gills of rainbow trout (*Oncorhynchus mykiss*) during salinity  
851 transfer. *J. Exp. Biol.* **206**, 4475-4486.

- 852 **Robertson, L. S. and McCormick, S. D.** (2012). Transcriptional profiling of the parr-smolt  
853 transformation in Atlantic salmon. *Comp. Biochem. Phys. D* **7**, 351-360.
- 854 **Schmitz, M.** (1995). Seasonal changes in hypoosmoregulatory ability in landlocked and  
855 anadromous populations of Arctic charr, *Salvelinus alpinus*, and Atlantic salmon, *Salmo salar*.  
856 *Environ. Biol. Fish.* **42**, 401-412.
- 857 **Scott, G. R., Richards, J. G., Forbush, B., Isenring, P. and Schulte, P. M.** (2004). Changes in  
858 gene expression in gills of the euryhaline killifish *Fundulus heteroclitus* after abrupt salinity  
859 transfer. *Am. J. Physiol-Cell Ph.* **287**, C300-C309.
- 860 **Seear, P. J., Carmichael, S. N., Talbot, R., Taggart, J. B., Bron, J. E. and Sweeney, G. E.**  
861 (2010). Differential gene expression during smoltification of Atlantic salmon (*Salmo salar* L.): a  
862 first large-scale microarray study. *Mar. Biotechnol.* **12**, 126-140.
- 863 **Shrimpton, J. M., Patterson, D. A., Richards, J. G., Cooke, S. J., Schulte, P. M., Hinch, S.**  
864 **G. and Farrell, A. P.** (2005). Ionoregulatory changes in different populations of maturing  
865 sockeye salmon *Oncorhynchus nerka* during ocean and river migration. *J. Exp. Biol.* **208**, 4069-  
866 4078.
- 867 **Silva, P., Solomon, R., Spokes, K. and Epstein, F.** (1977). Ouabain inhibition of gill Na-K-  
868 ATPase: relationship to active chloride transport. *J. Exp. Zool.* **199**, 419-426.
- 869 **Singer, T. D., Clements, K. M., Semple, J. W., Schulte, P. M., Bystriansky, J. S., Finstad,**  
870 **B., Fleming, I. A. and McKinley, R. S.** (2002). Seawater tolerance and gene expression in two  
871 strains of Atlantic salmon smolts. *Can. J. Fish Aquat. Sci.* **59**, 125-135.
- 872 **Sokal, R. and Rohlf, F.** (1995). Biometry. New York: W.H. Freeman and Company.
- 873 **Spring, J.** (1997). Hypothesis: vertebrate evolution by interspecific hybridisation - Are we  
874 polyploid? *FEBS Lett.* **400**, 2-8.
- 875 **Timusk E. R., Ferguson M. M., Moghadam H. K., Norman J. D., Wilson C. C., Danzmann**  
876 **R. G.** (2011). Genome evolution in the fish family Salmonidae: generation of a brook charr  
877 genetic map and comparisons among charrs (Arctic charr and brook charr) with rainbow trout.  
878 *BMC Genet.* **12**, 68, 2011.
- 879 **Tine, M., de Lorgeril, J., D'Cotta, H., Pepey, E., Bonhomme, F., Baroiller, J. F. and**  
880 **Durand, J.-D.** (2008). Transcriptional responses of the black-chinned tilapia *Sarotherodon*  
881 *melanotheron* to salinity extremes. *Mar. Genomics* **1**, 37-46.
- 882 **Tipsmark, C. K., Madsen, S. S., Seidelin, M., Christensen, A. S., Cutler, C. P. and Cramb,**  
883 **G.** (2002). Dynamics of Na<sup>+</sup>,K<sup>+</sup>,2Cl<sup>-</sup> cotransporter and Na<sup>+</sup>,K<sup>+</sup>-ATPase expression in the  
884 branchial epithelium of brown trout (*Salmo trutta*) and Atlantic salmon (*Salmo salar*). *J. Exp.*  
885 *Zool.* **293**, 106-118.
- 886 **Tipsmark, C. K., Küllerich, P., Nilsen, T. O., Ebbesson, L. O. E., Stefansson, S. O. and**  
887 **Madsen, S. S.** (2008). Branchial expression patterns of claudin isoforms in Atlantic salmon  
888 during seawater acclimation and smoltification. *Am. J. Physiol-Reg. I.* **294**, R1563-R1574.
- 889 **Tse, W. K. F., Au, D. W. T. and Wong, C. K. C.** (2006). Characterization of ion channel and  
890 transporter mRNA expressions in isolated gill chloride and pavement cells of seawater  
891 acclimating eels. *Biochem. Bioph. Res. Co.* **346**, 1181-1190.

- 892 **Van Itallie, C. M., Rogan, S., Yu, A., Vidal, L. S., Holmes, J. and Anderson, J. M.** (2006).  
893 Two splice variants of claudin-10 in the kidney create paracellular pores with different ion  
894 selectivities. *Am. J. Physiol-Renal* **291**, F1288-F1299.
- 895 **Varela, M., Herrera, M., and Gavin, J. L.** (2004). Inhibition of Na-K-ATPase in thick  
896 ascending limbs by NO depends on O<sub>2</sub>- and is diminished by a high salt diet. *Am. J. Physiol-*  
897 *Renal* **287**, F224-F230.
- 898 **Wilson, J. M., Laurent, P.** (2002). Fish gill morphology: Inside out. *J. Exp. Zool.* **293**, 192-213.
- 899 **Woo, Y. H., Walker, M. and Churchill, G. A.** (2010). Coordinated expression domains in  
900 mammalian genomes. *PLOS One* **5**, 8.
- 901 **Zamora, R., Vodovotz, Y., Alarcon, L., Betten, B., Loughran, P. A., Aulak, K. S., Steuhr, D.**  
902 **J., Gibson, K. F., and Billar, T. R.** (2001). Nitric oxide from the inducible nitric oxide synthase  
903 (iNOS) increase the expression of cytochrome P450 2E1 in iNOS-null hepatocytes in the  
904 absence of inflammatory stimuli. *Arch. Biochem. Biophys.* **390**, 287-294.
- 905

906 **Table 1.** Genes up-regulated in Arctic charr (*Salvelinus alpinus*) seawater gill libraries for  
 907 families 10 and 12 combined that exhibit mean expression ratios  $\geq 1$ .  
 908

| Hit accession | Hit description                                                   | Mean ER | Mean P-Value |
|---------------|-------------------------------------------------------------------|---------|--------------|
| XP_003961679  | splicing factor 3b subunit 1-like                                 | 6.7     | 0.000196     |
| XP_788663     | histamine H3 receptor-like                                        | 5.2     | 0.000311     |
| CAC82808      | inducible nitric oxide synthase                                   | 5.2     | 0.000878     |
| XP_003612234  | atp synthase subunit a chloroplastic                              | 4.9     | 0.001639     |
| ABC72122      | Myeloperoxidase                                                   | 4.7     | 0.000581     |
| NP_001098159  | transcription factor c-myb                                        | 4.3     | 0.024577     |
| XP_003228519  | adenosylhomocysteinase 3-like                                     | 4.1     | < 0.000001   |
| XP_003440931  | 2-oxoglutarate receptor 1-like                                    | 3.8     | 0.034657     |
| XP_003455055  | uncharacterized protein LOC100705794                              | 3.5     | 0.020761     |
| ACI69118      | transmembrane and tpr repeat-containing protein 4                 | 3.3     | < 0.000001   |
| XP_001642069  | predicted protein                                                 | 3.2     | 0.025506     |
| NP_001167620  | cytochrome P450, family 1, subfamily B, polypeptide 1             | 3.2     | < 0.000001   |
| EHH17669      | hypothetical protein EGK_14124, partia                            | 3.2     | < 0.000001   |
| ACI69602      | c-c motif chemokine 19 precursor                                  | 2.9     | 0.008692     |
| AAX24831      | sjchgc03009 protein                                               | 2.7     | < 0.000001   |
| AAX25032      | sjchgc04714 protein                                               | 2.7     | < 0.000001   |
| AAQ10900      | cytochrome p450 1a                                                | 2.6     | 0.000143     |
| NP_001092900  | asteroid homolog 1                                                | 2.4     | 0.030242     |
| XP_003459735  | novel protein vertebrate tumor necrosis factor receptor member 21 | 2.4     | 0.023096     |
| AAQ10899      | cytochrome p450 1a                                                | 2.4     | 0.001698     |
| ACM09026      | gtpase imap family member 7                                       | 2.3     | 0.027571     |
| ACH85356      | hypothetical protein                                              | 2.1     | < 0.000001   |
| ACJ02099      | FGF2                                                              | 2.0     | 0.002211     |
| NP_001134448  | e3 ubiquitin-protein ligase rnf138                                | 1.9     | 0.000081     |
| NP_998587     | udp glucuronosyltransferase 1 family polypeptide a3 precursor     | 1.9     | 0.008261     |
| CBN81775      | aryl hydrocarbon receptor repressor                               | 1.4     | 0.026637     |
| ACM08262      | c-c motif chemokine 20 precursor                                  | 1.4     | 0.002684     |
| XP_003444970  | probable g-protein coupled receptor 61-like                       | 1.3     | 0.017361     |
| ADG29182      | prostate stem cell antigen precursor-like                         | 1.3     | 0.002470     |
| NP_001116443  | myxovirus (influenza virus) resistance g                          | 1.2     | 0.015531     |
| XP_003451252  | egl nine homolog 3-like isoform X1                                | 1.2     | 0.000165     |
| XP_001333205  | hypothetical protein LOC796178                                    | 1.1     | 0.022922     |

| <b>Hit accession</b> | <b>Hit description</b>                                        | <b>Mean ER</b> | <b>Mean P-Value</b> |
|----------------------|---------------------------------------------------------------|----------------|---------------------|
| CBN81435             | centrosomal protein of 55 kda                                 | 1.1            | 0.018376            |
| XP_003457336         | forkhead box protein q1-like                                  | 1.1            | < 0.000001          |
| XP_003456889         | interleukin-1 receptor accessory protein-like                 | 1.1            | 0.000341            |
| XP_002733521         | RETRotransposon-like family member (retr-1)-like              | 1.1            | 0.000024            |
| ACI69358             | cd83 antigen precursor                                        | 1.1            | 0.013459            |
| CAG03861             | unnamed protein product                                       | 1.0            | 0.003472            |
| NP_001134708         | tumor necrosis factor receptor superfamily member 5 precursor | 1.0            | 0.022405            |
| XP_003453070         | ribonuclease zc3h12a                                          | 1.0            | 0.007395            |
| NP_001133906         | g1 s-specific cyclin-e2                                       | 1.0            | 0.018579            |

909  
910  
911  
912  
913  
914  
915

Hit accessions are from the NCBI non-redundant protein database; Mean ER is the mean expression from families 10 and 12; expression ratios represent the  $\log_2$  fold-change in gene expression in seawater gill tissue relative to freshwater gill tissue; Mean P-Value represents the mean FDR-corrected P-value from families 10 and 12.

916 **Table 2.** Genes down-regulated in Arctic charr (*Salvelinus alpinus*) seawater gill libraries for  
 917 families 10 and 12 combined that exhibit mean expression ratios  $\geq 1$ .  
 918

| Hit accession | Hit description                                                          | Mean ER | Mean P-Value |
|---------------|--------------------------------------------------------------------------|---------|--------------|
| NP_001073337  | orexin receptor type 2                                                   | -3.6    | 0.006369     |
| XP_003746712  | PREDICTED: uncharacterized protein<br>LOC100906026                       | -3.3    | 0.021946     |
| NP_001117748  | glucose transporter 1A                                                   | -2.9    | 0.001800     |
| CBN81991      | Villin-1                                                                 | -2.8    | 0.005164     |
| XP_001304408  | hypothetical protein                                                     | -2.8    | 0.000179     |
| XP_003965142  | phosphatidylinositol 4-phosphate 5-kinase-<br>like protein 1-like        | -2.7    | 0.000001     |
| XP_003440665  | ferm domain-containing protein 5-like                                    | -2.7    | 0.002285     |
| XP_003961509  | vesicular glutamate transporter 1-like                                   | -2.5    | 0.019769     |
| XP_003447126  | cat eye syndrome critical region protein 5<br>homolog                    | -2.5    | 0.004807     |
| NP_001134781  | vesicle-associated membrane protein 5-like                               | -2.4    | 0.000040     |
| XP_003453591  | regulator of g-protein signaling 4-like                                  | -2.4    | 0.000020     |
| BAF37936      | tc1-like transporase                                                     | -2.3    | 0.020455     |
| XP_001921093  | estrogen-related receptor gamma                                          | -2.2    | 0.000044     |
| CAG06489      | unnamed protein product                                                  | -2.1    | 0.000001     |
| XP_003969602  | iroquois-class homeodomain protein irx-3-<br>like                        | -2.0    | < 0.000001   |
| XP_001631851  | predicted protein                                                        | -2.0    | 0.000389     |
| ACN60195      | retrotransposable element tf2 155 kda<br>protein type 3                  | -1.9    | 0.003592     |
| NP_956302     | pancreatic progenitor cell differentiation and<br>proliferation factor b | -1.9    | < 0.000001   |
| XP_002958534  | hypothetical protein<br>VOLCADRAFT_69561                                 | -1.9    | 0.000082     |
| XP_003452618  | zinc transporter ZIP3-like isoform X1                                    | -1.8    | < 0.000001   |
| XP_002733851  | retrotransposon-like family member (retr-1)-<br>like                     | -1.8    | 0.000832     |
| NP_001140147  | cdp-diacylglycerol--serine o-<br>phosphatidyltransferase                 | -1.7    | 0.006255     |
| ACM09149      | sulfotransferase 6b1                                                     | -1.7    | 0.000633     |
| ZP_09047056   | hypothetical protein HMPREF1020_01135                                    | -1.7    | 0.000005     |
| AFR53956      | Transposase                                                              | -1.6    | 0.009962     |
| XP_002933173  | hypothetical protein LOC100488659                                        | -1.6    | 0.000098     |
| ACO09698      | sulfotransferase 6b1                                                     | -1.6    | 0.000062     |

| <b>Hit accession</b> | <b>Hit description</b>                         | <b>Mean ER</b> | <b>Mean P-Value</b> |
|----------------------|------------------------------------------------|----------------|---------------------|
| ADX97065             | amine sulfotransferase                         | -1.5           | 0.001560            |
| XP_003497853         | prominin-2-like isoform 2                      | -1.5           | 0.006462            |
| XP_003449393         | hypothetical protein LOC100690300              | -1.5           | 0.003664            |
| XP_001339010         | rho gtpase-activating protein 24               | -1.5           | < 0.000001          |
| XP_003458639         | metastasis suppressor protein 1                | -1.4           | 0.000046            |
| XP_003439033         | synapsin-2-like isoform X1                     | -1.4           | 0.001324            |
| XP_001632820         | predicted protein                              | -1.4           | 0.001776            |
| BAC10574             | nrf2-associated protein keap1                  | -1.4           | < 0.000001          |
| ACO09696             | claudin 8                                      | -1.3           | < 0.000001          |
| XP_003963031         | ring finger protein 223-like                   | -1.3           | 0.000049            |
| XP_003969444         | hepacam family member 2-like                   | -1.3           | 0.000358            |
| XP_003978005         | protein fam69c-like                            | -1.2           | 0.003272            |
| XP_003448007         | mucolipin-1-like                               | -1.2           | 0.023517            |
| XP_003199551         | uncharacterized protein LOC321155              | -1.2           | 0.000027            |
| XP_003969864         | membrane progesterin receptor gamma-b-like     | -1.2           | 0.000016            |
| XP_003965239         | g-protein-signaling modulator 1-like           | -1.2           | 0.000460            |
| XP_003459874         | seizure protein 6 homolog                      | -1.2           | 0.002602            |
| XP_003440685         | delta-like protein 4-like                      | -1.2           | < 0.000001          |
| ABQ01988             | reverse transcriptase-like protein             | -1.1           | 0.024643            |
| CAC81754             | corticotropin-releasing factor receptor type 2 | -1.1           | 0.000010            |

919  
920  
921  
922

See Table 1 for legend.



923 **Table 3.** Overrepresented Gene Ontology categories for up- and down-regulated genes combined  
 924 from Arctic charr (*Salvelinus alpinus*) seawater gill libraries for families 10 and 12 combined.  
 925

| GO ID                 | Description                          | P-Value  | Mean PD | Mean FE |
|-----------------------|--------------------------------------|----------|---------|---------|
| <b>Up-regulated</b>   |                                      |          |         |         |
| 51301                 | cell division                        | 3.06E-12 | 0.112   | 4.5     |
| 22403                 | cell cycle phase                     | 3.85E-12 | 0.120   | 3.9     |
| 280                   | nuclear division                     | 4.63E-12 | 0.098   | 5.1     |
| 7067                  | Mitosis                              | 4.63E-12 | 0.098   | 5.1     |
| 87                    | M phase of mitotic cell cycle        | 1.04E-11 | 0.099   | 5.0     |
| 48285                 | organelle fission                    | 1.05E-11 | 0.097   | 4.9     |
| 279                   | M phase                              | 1.79E-11 | 0.109   | 4.3     |
| 278                   | mitotic cell cycle                   | 7.78E-10 | 0.107   | 3.6     |
| 7049                  | cell cycle                           | 4.43E-09 | 0.137   | 2.8     |
| 22402                 | cell cycle process                   | 8.40E-09 | 0.114   | 3.0     |
| 7059                  | chromosome segregation               | 4.49E-06 | 0.047   | 6.6     |
| 51726                 | regulation of cell cycle             | 3.08E-04 | 0.065   | 2.5     |
| 6996                  | organelle organization               | 5.48E-04 | 0.098   | 1.8     |
| 75                    | cell cycle checkpoint                | 7.53E-04 | 0.037   | 4.6     |
| 6323                  | DNA packaging                        | 3.29E-03 | 0.030   | 6.3     |
| 30261                 | chromosome condensation              | 4.54E-03 | 0.022   | 9.9     |
| 6259                  | DNA metabolic process                | 7.27E-03 | 0.089   | 2.8     |
| 71103                 | DNA conformation change              | 7.62E-03 | 0.036   | 5.5     |
| 6260                  | DNA replication                      | 1.47E-02 | 0.066   | 4.4     |
| 51983                 | regulation of chromosome segregation | 1.56E-02 | 0.013   | 14.6    |
| 7093                  | mitotic cell cycle checkpoint        | 1.86E-02 | 0.023   | 5.3     |
| 8283                  | cell proliferation                   | 1.88E-02 | 0.044   | 2.2     |
| 6261                  | DNA-dependent DNA replication        | 2.37E-02 | 0.036   | 6.8     |
| 9404                  | toxin metabolic process              | 2.40E-02 | 0.011   | 18.1    |
| 6950                  | response to stress                   | 2.52E-02 | 0.072   | 1.5     |
| <b>Down-regulated</b> |                                      |          |         |         |
| 7275                  | multicellular organismal development | 8.68E-06 | 0.172   | 1.8     |
| 48731                 | system development                   | 3.68E-05 | 0.157   | 1.8     |
| 32502                 | developmental process                | 4.58E-05 | 0.172   | 1.7     |
| 48856                 | anatomical structure development     | 6.92E-05 | 0.158   | 1.8     |
| 32501                 | multicellular organismal process     | 1.84E-04 | 0.181   | 1.6     |

| <b>GO ID</b> | <b>Description</b> | <b>P-Value</b> | <b>Mean PD</b> | <b>Mean FE</b> |
|--------------|--------------------|----------------|----------------|----------------|
| 48513        | organ development  | 3.10E-03       | 0.127          | 1.9            |

926

927 GO ID = Gene Ontology category identification number; P-value = corrected FDR P-value  
 928 statistic; Mean PD = the mean from families 10 and 12 of the proportion difference of genes  
 929 comprising experimental and reference Gene Ontology categories (i.e., PD = [proportion genes  
 930 in experimental - proportion genes in reference]); Mean FE = mean fold-enrichment, or the mean  
 931 ratio from families 10 and 12 of the proportion of genes comprising experimental and reference  
 932 Gene Ontology categories (i.e., FE = [proportion genes in experimental / proportion genes in  
 933 reference]).

934

935

936 **Table 4.** Interfamilial differences in Gene Ontology category (GO) overrepresentation for up-  
937 regulated genes from Arctic charr (*Salvelinus alpinus*) seawater gill libraries.  
938

| <b>GO accession</b> | <b>GO description</b>                            | <b>P-F10</b> | <b>P-F12</b> | <b>P-Value</b> |
|---------------------|--------------------------------------------------|--------------|--------------|----------------|
| 8380                | RNA splicing                                     | 0.081        | 0.022        | 0.0018         |
| 6397                | mRNA processing                                  | 0.089        | 0.028        | 0.0022         |
| 6396                | RNA processing                                   | 0.119        | 0.041        | 0.0008         |
| 90304               | nucleic acid metabolic process                   | 0.315        | 0.184        | 0.0004         |
| 6139                | nucleobase-containing compound metabolic process | 0.349        | 0.222        | 0.0011         |
| 34641               | cellular nitrogen compound metabolic process     | 0.357        | 0.234        | 0.0017         |
| 6807                | nitrogen compound metabolic process              | 0.370        | 0.250        | 0.0027         |

939 P-F10 and P-F12 represent the proportion of up-regulated genes that occur within the respective  
940 GO category for families 10 and 12, respectively; P-Value statistics are presented for only those  
941 that pass the FDR corrected threshold of 0.003 ( $\alpha = 0.05$ ); no significant interfamilial differences  
942 were found for down-regulated genes.  
943  
944  
945

946 **Table 5.** The number of genes differentially expressed in Arctic charr (*Salvelinus alpinus*) gill  
 947 after transfer from freshwater to seawater that localize to conserved synteny blocks on three-  
 948 spined stickleback (*Gasterosteus aculeatus*) chromosomes.  
 949

| AC        | GA Synteny  |            | F10           |                  |               | F12    |       |
|-----------|-------------|------------|---------------|------------------|---------------|--------|-------|
| LG        | Chr.        | # Genes    | Block (Mbp)   | # DEGs           | P             | # DEGs | P     |
| <b>1</b>  | <b>XVII</b> | <b>282</b> | <b>5.921</b>  | <b>18 (8.3)</b>  | <b>0.001*</b> | 12     | 0.787 |
| 4         | I           | 838        | 21.343        | 26               | 0.819         | 31     | 0.211 |
| 4         | XIX         | 13         | 0.146         | 1                | 0.341         | 2      | 0.091 |
| 4         | I&XIX       | 851        | 21.489        | 27               | 0.725         | 33     | 0.312 |
| 5         | VII         | 98         | 1.336         |                  |               | 1      | 0.098 |
| 6         | IV          | 342        | 7.485         | 12               | 0.563         | 21     | 0.191 |
| 7         | XII         | 335        | 5.649         | 10               | 0.988         | 16     | 0.883 |
| 8         | V           | 637        | 10.407        | 17               | 0.653         | 29     | 0.952 |
| <b>11</b> | <b>XVII</b> | <b>479</b> | <b>10.007</b> | <b>24 (14.5)</b> | <b>0.010</b>  | 19     | 0.514 |
| 12        | I           | 47         | 0.477         |                  |               | 1      | 0.433 |
| 13        | IX          | 201        | 5.585         | 9                | 0.220         | 15     | 0.066 |
| 15        | II          | 223        | 6.841         | 6                | 0.809         | 15     | 0.148 |
| 17        | XII         | 362        | 7.480         | 9                | 0.591         | 16     | 0.871 |
| 18        | V           | 39         | 0.479         |                  |               | 2      | 0.881 |
| 19        | III         | 451        | 8.255         | 10               | 0.348         | 19     | 0.699 |
| 20        | XI          | 924        | 14.063        | 26               | 0.775         | 34     | 0.178 |
| 20        | XVI         | 264        | 4.260         | 9                | 0.680         | 14     | 0.601 |
| 20        | XI&XVI      | 1188       | 18.324        | 35               | 0.959         | 48     | 0.346 |
| 21        | IX          | 184        | 2.859         | 8                | 0.284         | 6      | 0.399 |
| 23        | VII         | 243        | 3.525         | 8                | 0.772         | 5      | 0.064 |
| 23        | XX          | 471        | 8.168         | 12               | 0.591         | 27     | 0.255 |
| 23        | VII&XX      | 714        | 11.693        | 20               | 0.133         | 32     | 0.878 |
| 24        | IV          | 22         | 0.241         | 1                | 0.675         | 2      | 0.347 |
| 25        | I           | 526        | 13.043        | 13               | 0.501         | 23     | 0.804 |
| <b>28</b> | <b>XIV</b>  | <b>431</b> | <b>9.642</b>  | <b>22 (13)</b>   | <b>0.010</b>  | 24     | 0.353 |
| 31        | X           | 80         | 1.584         | 4                | 0.302         | 5      | 0.504 |
| 32        | III         | 471        | 9.273         | 10               | 0.280         | 19     | 0.563 |
| 34        | IX          | 160        | 4.005         | 7                | 0.309         | 11     | 0.191 |
| 35        | XX          | 457        | 7.898         | 12               | 0.666         | 27     | 0.196 |
| 36        | XVI         | 273        | 7.232         | 12               | 0.175         | 12     | 0.874 |
| 37        | VII         | 385        | 10.836        | 10               | 0.669         | 18     | 0.948 |
| 39        | XIII        | 173        | 4.173         | 6                | 0.706         | 9      | 0.718 |

950 Arctic charr linkage groups (AC LG) obtained from Timusk et al., 2011; stickleback  
 951 chromosomes (chr) obtained from Ensembl (v68) (Flicek et al., 2013; Jones et al., 2012); synteny  
 952 block sizes obtained from Norman et al., 2012; numbers in parentheses for family 10 (F10) and  
 953 family 12 (F12) differentially expressed genes (DEG) represent expected values from 2X2 chi-  
 954 square test for independence; bold values are significant at  $P < 0.05$ ; \* values pass FDR  
 955 significance threshold ( $\alpha = 0.05$ ).  
 956

957 **Table 6.** Comparison of genes differentially expressed in Arctic charr (*Salvelinus alpinus*) and  
 958 sockeye salmon (*Oncorhynchus nerka*) seawater gill, and Atlantic salmon (*Salmo salar*)  
 959 freshwater smolt gill tissue.  
 960

| <b>Gene annotation</b>                                                   |                |           |           |           |
|--------------------------------------------------------------------------|----------------|-----------|-----------|-----------|
| <b>Description</b>                                                       | <b>Gene ID</b> | <b>AC</b> | <b>SS</b> | <b>AS</b> |
| NADH dehydrogenase 1 alpha subcomplex subunit 9, mitochondrial precursor | 209732928      | +         | +         |           |
| Mitochondrial ribosomal protein 63                                       | 209736992      | +         | +         |           |
| Argininosuccinate synthase                                               | 213514834      | +         | +         |           |
| Tumor-associated calcium signal transducer 2 precursor                   | 213514296      | +         | -         |           |
| Zinc finger protein Gfi-1b                                               | 213514862      | +         | -         |           |
| Zymogen granule membrane protein 16 precursor                            | 221222226      | +         | -         |           |
| bloodthirsty-2                                                           | 401664016      | +         | -         |           |
| THAP domain-containing protein 11                                        | 213512444      | +         |           | +         |
| transcription factor Spi-C                                               | 213514860      | +         |           | +         |
| rab GDP dissociation inhibitor beta                                      | 213515058      | +         |           | +         |
| Non-histone chromosomal protein H6                                       | 221219742      | +         |           | +         |
| Importin subunit alpha-2                                                 | 223647006      | +         |           | +         |
| FK506-binding protein 4                                                  | 225707240      | +         |           | +         |
| PREDICTED: frizzled-8-like                                               | 348520010      | +         |           | +         |
| FGF2                                                                     | 209962463      | -/+       | -         |           |
| TC1-like transposase                                                     | 357575246      | -/+       | -         |           |
| reverse transcriptase-like protein                                       | 146147385      | -         | -         |           |
| apolipoprotein CII precursor                                             | 185133660      | -         | -         |           |
| secreted acidic cysteine rich glycoprotein                               | 197632219      | -         | -         | +         |
| SPARC precursor                                                          | 209155872      | -         | -         |           |
| unnamed protein product                                                  | 47224919       | -         |           | +         |
| lumican precursor                                                        | 213514094      | -         |           | +         |
| Pirin                                                                    | 213514874      | -         |           | +         |
| EPS8L1a-like protein                                                     | 374722810      | -         |           | +         |
| beta-globin                                                              | 1431593        |           | +         | +         |
| beta-globin                                                              | 1431608        |           | +         | +         |
| hemoglobin subunit alpha                                                 | 185134045      |           | +         | +         |
| Hemoglobin subunit alpha-4                                               | 209731594      |           | +         | +         |
| Hemoglobin subunit beta                                                  | 209735786      |           | +         | +         |
| Type-1 angiotensin II receptor-associated protein-like                   | 213512516      |           | +         | +         |
| tumor protein D52                                                        | 213514032      |           | +         | +         |
| Hemoglobin subunit alpha                                                 | 223646832      |           | +         | +         |

---

**Gene annotation**

---

| <b>Description</b>                                     | <b>Gene ID</b> | <b>AC</b> | <b>SS</b> | <b>AS</b> |
|--------------------------------------------------------|----------------|-----------|-----------|-----------|
| Hemoglobin subunit beta-1                              | 223646870      |           | +         | +         |
| FAM139A                                                | 224613362      |           | +         | +         |
| 40 kDa peptidyl-prolyl cis-trans isomerase             | 225703320      |           | +         | +         |
| conserved hypothetical protein                         | 294886057      |           | +         | +         |
| PREDICTED: ETS-related transcription factor Elf-2-like | 410917177      |           | +         | +         |
| C-C motif chemokine 19 precursor                       | 209733266      |           | -         | +         |
| fish virus induced TRIM protein                        | 255983023      |           | -         | +         |
| Hemoglobin subunit beta                                | 209732622      |           |           | +         |

---

961  
962  
963  
964  
965  
966  
967  
968

Up-regulated genes denoted by "+"; down-regulated genes denoted by "-"; data for Arctic charr (AC) is from this study; data for sockeye salmon (SS) was obtained from Evans et al., (2011), and for Atlantic salmon (AS) from Seear et al., (2010) and Robertson and McCormick (2012); genes assigned +/- consist of independent contigs that align to the same reference sequence but exhibit divergent expression profiles.

969 **Figure Captions**

970

971 **Fig. 1. Comparison of genes differentially expressed in seawater gill tissue from Arctic**  
972 **charr (*Salvelinus alpinus*) families 10 and 12.** A description of these genes is provided in  
973 Table S1.

974

975 **Fig. 2. Relationship between  $\log_2$  expression ratios for genes differentially expressed in**  
976 **seawater gill tissue from two Arctic charr (*Salvelinus alpinus*) families.**

977

978 **Fig. 3. Proportion and frequency distribution of the difference in  $\log_2$  expression ratios**  
979 **between genes differentially expressed in seawater gill tissue from two Arctic charr**  
980 **(*Salvelinus alpinus*) families.**

981

982 **Fig. 4. Chromosomal comparisons of mean intergenic distances (IGDs) of stickleback**  
983 **(*Gasterosteus aculeatus*) genes and genes differentially expressed in seawater gill tissue**  
984 **from two Arctic charr (*Salvelinus alpinus*) families.** False discovery rate-corrected  
985 significance is denoted by triangles ( $P \leq 0.001$ ), squares ( $P \leq 0.01$ ) and circles ( $P \leq 0.05$ ), for  
986 families 10 (blue) and 12 (red), which are bound by 95% confidence intervals. The mean  
987 difference in megabase pairs (Mbp) was calculated by subtracting the mean IGD from  
988 differentially expressed genes that align to a particular stickleback chromosome from the mean  
989 IGD of the entire stickleback chromosome.

990

991 **Fig. 5. The methionine cycle. Blue (family 10) and red (family 12) arrows denote the**  
992 **directional change in transcription of the respective enzyme genes observed in Arctic charr**  
993 **(*Salvelinus alpinus*) gill tissue after 10-days of exposure to full strength seawater.** Genes for  
994 all of the enzymes in the methionine cycle were expressed, including cystathionine beta-synthase  
995 (EC 4.2.1.22); enzymes absent arrows were not differentially expressed. The dashed line  
996 indicates the thermodynamically favoured direction of the reversible reaction catalyzed by  
997 adenosylhomocysteinase. Methyltransferase (EC 2.1.1); adenosylhomocysteinase (EC 3.3.1.1);  
998 adenosine kinase (EC 2.7.1.20); 5'-nucleotidase (EC 3.1.3.5); betaine-homocysteine S-  
999 methyltransferase (EC 2.1.1.5); methionine synthase (EC 2.1.1.13); methionine  
1000 adenosyltransferase (EC 2.5.1.6). Figure modified from James et al., (2002).

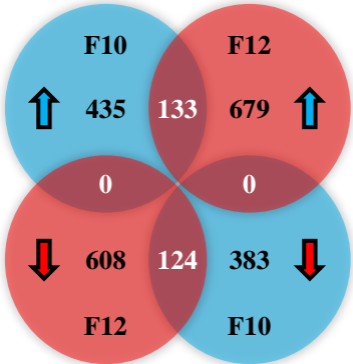



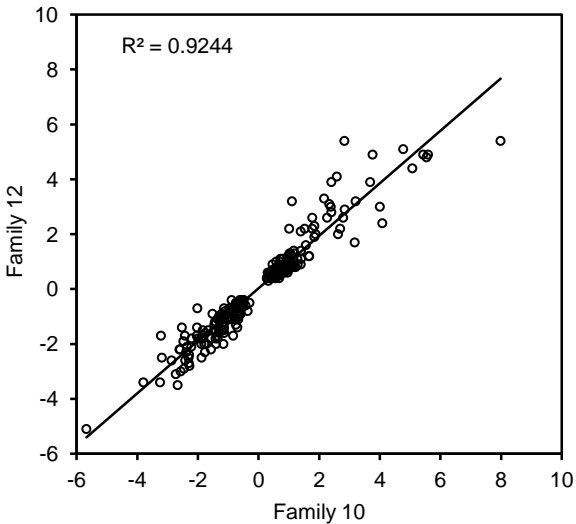

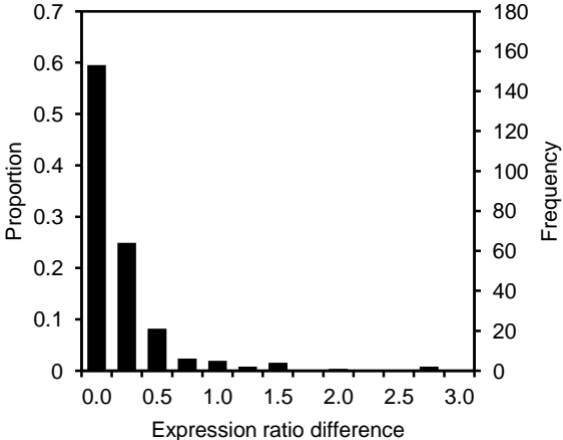

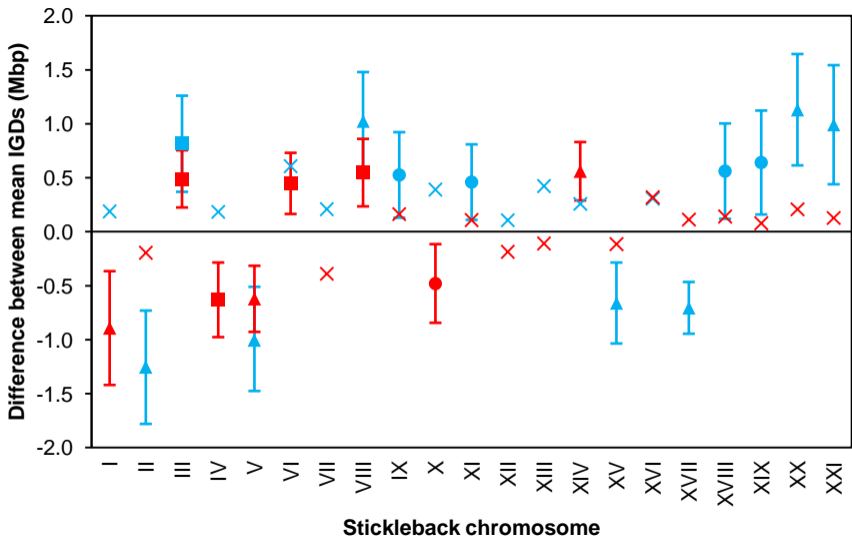

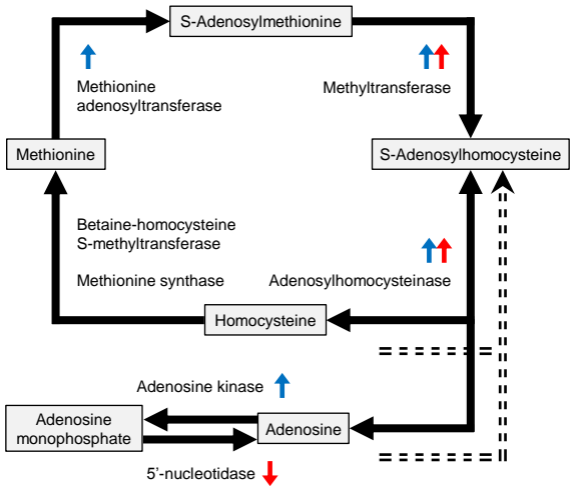

Source: https://cob.silverchair.com/jeb/article-pdf/doi/10.1242/jeb.107441/2037950/jeb_107441.pdf
